# Supplementary material for: Group 4 alkoxide complexes containing [NNO]-type scaffold: synthesis, structural characterization and polymerization studies
Source: Royal Society of Chemistry journal article supplement (doi:10.1039/c5ra26721h), 2016-01-01
Supplement: c5ra26721h1.pdf [file c5ra26721h1.pdf]

## **Supporting Information**

**Table S1.** Crystal data for **3a**, **3b** and **3c**

| Complex                                                         | <b>3a</b>                                                                     | <b>3b</b>                                                                                     | <b>3c</b>                                                                                     |
|-----------------------------------------------------------------|-------------------------------------------------------------------------------|-----------------------------------------------------------------------------------------------|-----------------------------------------------------------------------------------------------|
| CCDC No.                                                        | 1438097                                                                       | 1438098                                                                                       | 1438099                                                                                       |
| Empirical formula                                               | C <sub>44</sub> H <sub>60</sub> N <sub>8</sub> O <sub>6</sub> Ti <sub>2</sub> | C <sub>48</sub> H <sub>68</sub> N <sub>8</sub> O <sub>6</sub> Cl <sub>4</sub> Zr <sub>2</sub> | C <sub>46</sub> H <sub>62</sub> N <sub>8</sub> O <sub>6</sub> Cl <sub>6</sub> Hf <sub>2</sub> |
| Molecular weight                                                | 892.74                                                                        | 1177.34                                                                                       | 1392.7                                                                                        |
| Crystal system                                                  | Monoclinic                                                                    | Triclinic                                                                                     | Triclinic                                                                                     |
| Space group                                                     | C2/c                                                                          | P-1                                                                                           | P 1                                                                                           |
| Temp/K                                                          | 298(2)                                                                        | 298(2)                                                                                        | 298(2)                                                                                        |
| Wavelength (Å)                                                  | 0.71073                                                                       | 0.71073                                                                                       | 0.71073                                                                                       |
| <i>a</i> (Å)                                                    | 11.1634(4)                                                                    | 9.9338(13)                                                                                    | 9.6702(3)                                                                                     |
| <i>b</i> (Å)                                                    | 24.5170(9)                                                                    | 11.1209(15)                                                                                   | 10.9556(3)                                                                                    |
| <i>c</i> (Å)                                                    | 17.6569(6)                                                                    | 14.560(2)                                                                                     | 14.5845(4)                                                                                    |
| $\alpha$ (°)                                                    | 90                                                                            | 106.403(6)                                                                                    | 108.4480(10)                                                                                  |
| $\beta$ (°)                                                     | 94.8010(10)                                                                   | 91.013(7)                                                                                     | 90.6828(11)                                                                                   |
| $\gamma$ (°)                                                    | 90                                                                            | 108.188(6)                                                                                    | 101.2321(10)                                                                                  |
| <i>V</i> (Å <sup>3</sup> )                                      | 4815.6(3)                                                                     | 1456.0(4)                                                                                     | 1433.15(7)                                                                                    |
| <i>Z</i>                                                        | 4                                                                             | 1                                                                                             | 1                                                                                             |
| <i>D</i> <sub>calc</sub> (g/cm <sup>3</sup> )                   | 1.231                                                                         | 1.343                                                                                         | 1.614                                                                                         |
| Reflns collected                                                | 17890                                                                         | 15810                                                                                         | 21435                                                                                         |
| GOF                                                             | 1.022                                                                         | 1.111                                                                                         | 1.054                                                                                         |
| F(000)                                                          | 1888                                                                          | 608                                                                                           | 688                                                                                           |
| Final <i>R</i> indices ( <i>I</i> >2σ( <i>I</i> )) <sup>a</sup> | <i>R</i> <sub>1</sub> = 0.0384,<br><i>wR</i> <sub>2</sub> = 0.1006            | <i>R</i> <sub>1</sub> = 0.0483,<br><i>wR</i> <sub>2</sub> = 0.1281                            | <i>R</i> <sub>1</sub> = 0.0201,<br><i>wR</i> <sub>2</sub> = 0.0474                            |
| <i>R</i> indices (all data)                                     | <i>R</i> <sub>1</sub> = 0.0538,<br><i>wR</i> <sub>2</sub> = 0.1113            | <i>R</i> <sub>1</sub> = 0.0640,<br><i>wR</i> <sub>2</sub> = 0.1496                            | <i>R</i> <sub>1</sub> = 0.0228,<br><i>wR</i> <sub>2</sub> = 0.0490                            |

$$^a R_1 = \frac{\sum |F_o| - |F_c|}{\sum |F_o|}, wR_2 = \left[ \frac{\sum (F_o^2 - F_c^2)^2}{\sum w(F_o^2)^2} \right]^{1/2}$$

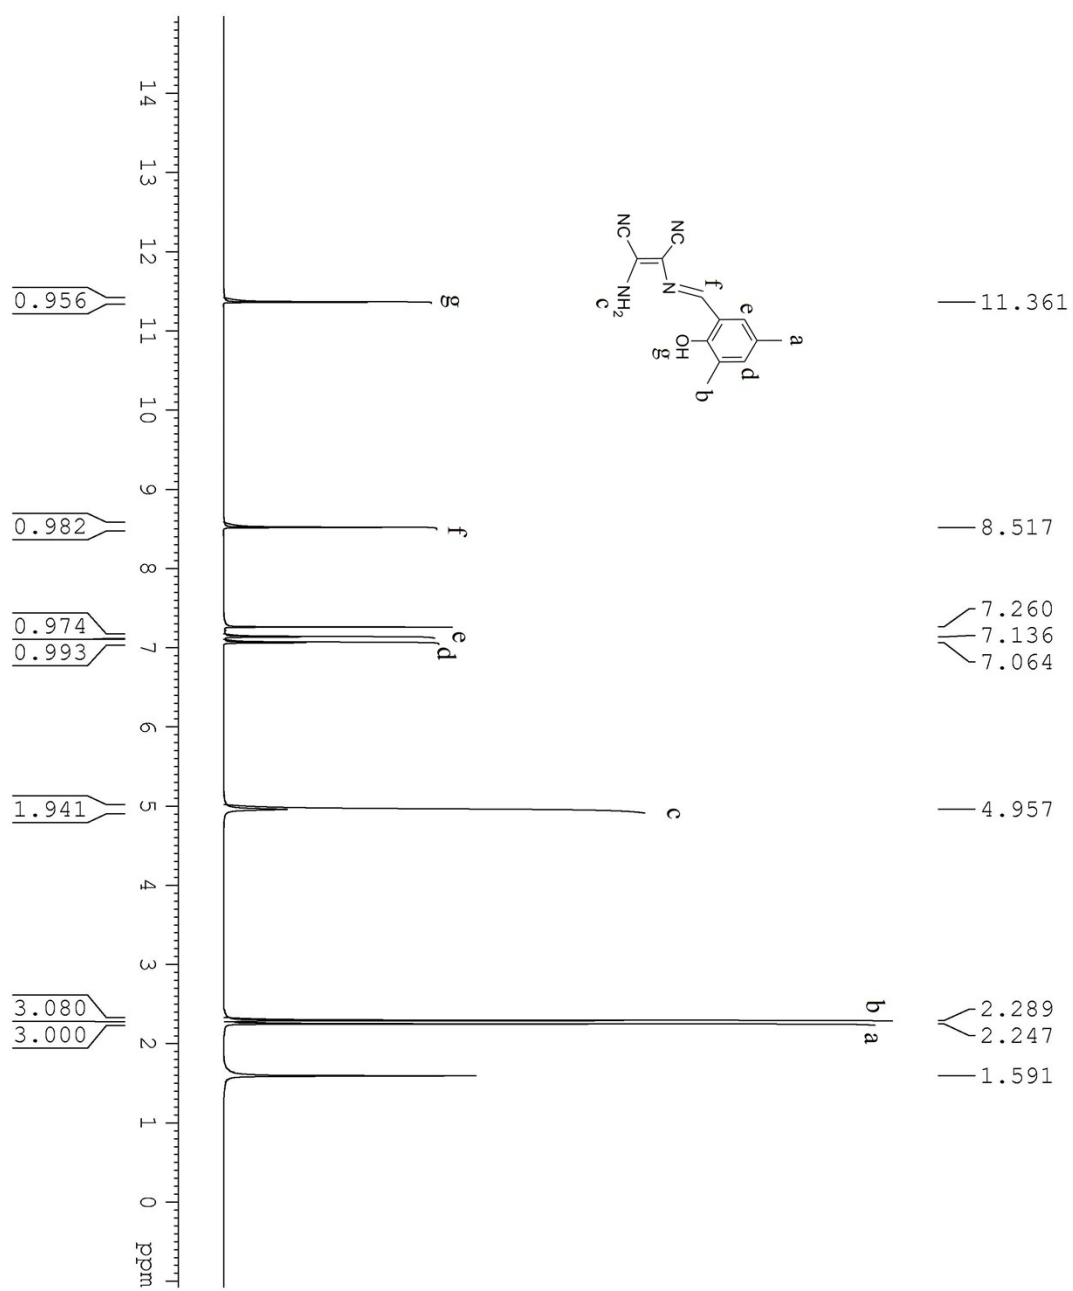

**Fig. S1.**  $^1H$  NMR (500 MHz,  $CDCl_3$ ) of  $L2(H)_2$

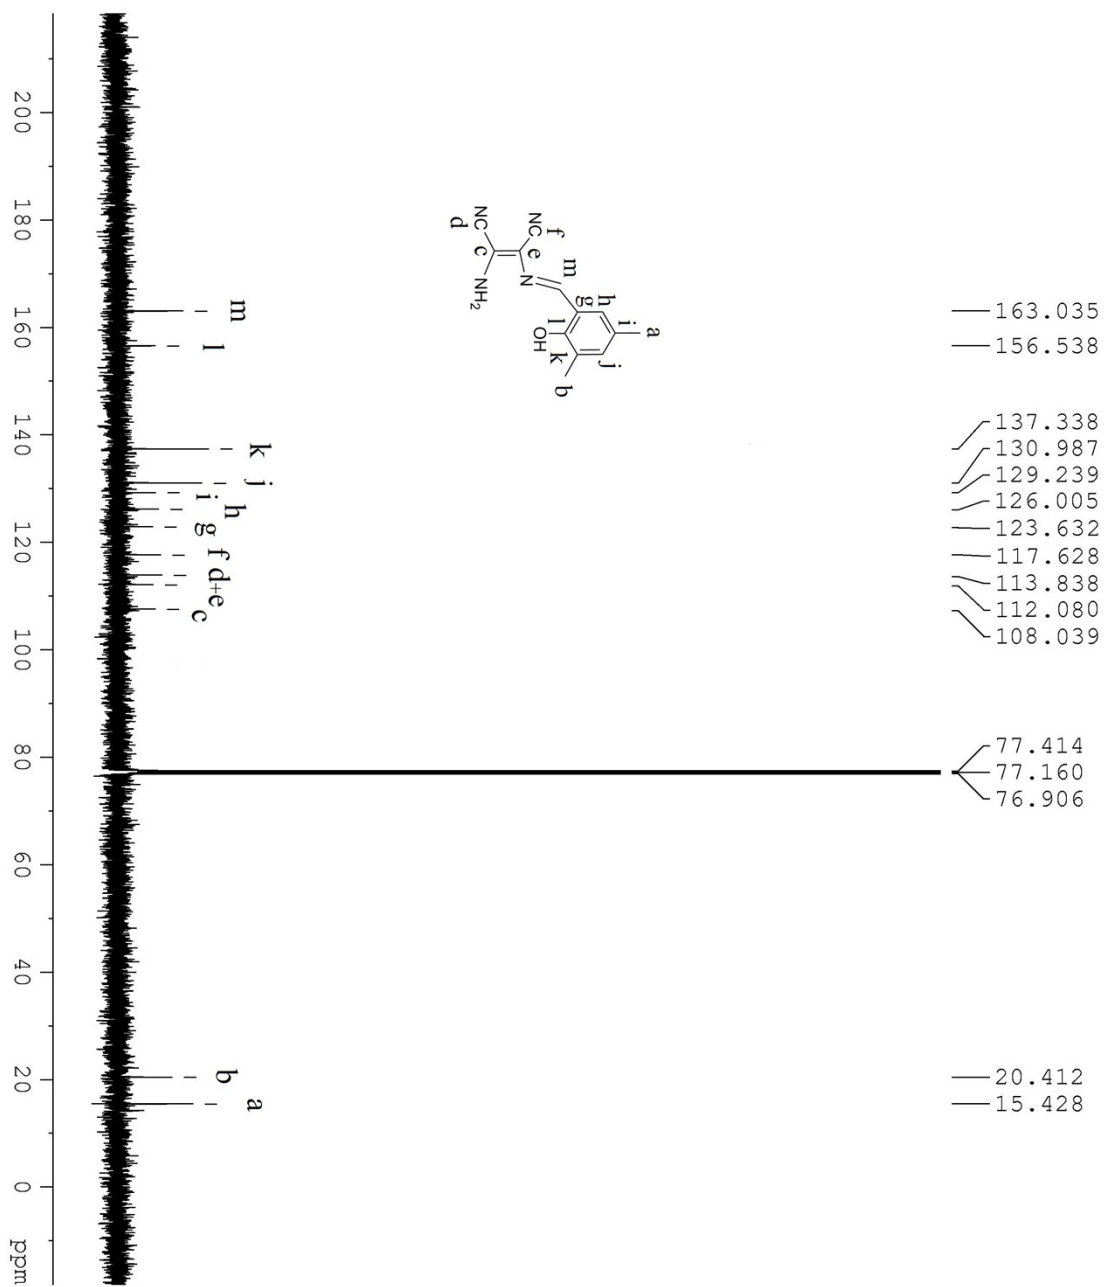

Fig. S2.  $^{13}C$  NMR (125 MHz,  $CDCl_3$ ) of  $L2(H)_2$

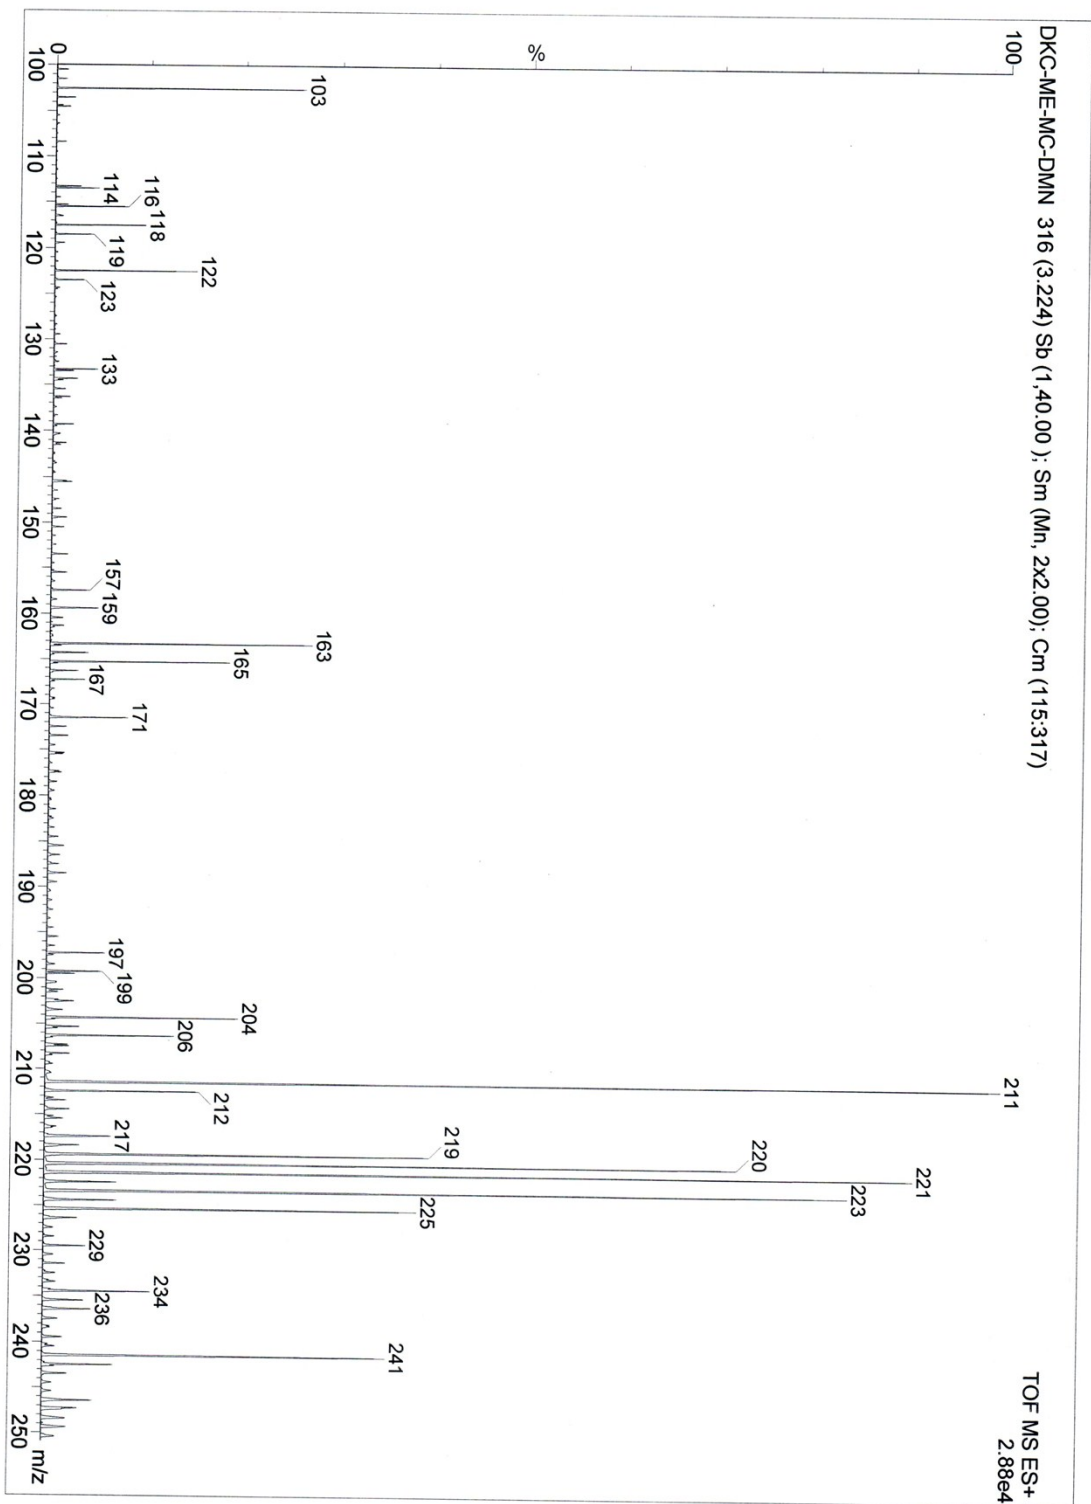

Fig. S3. ESI-MS spectrum of  $L2(H)_2$

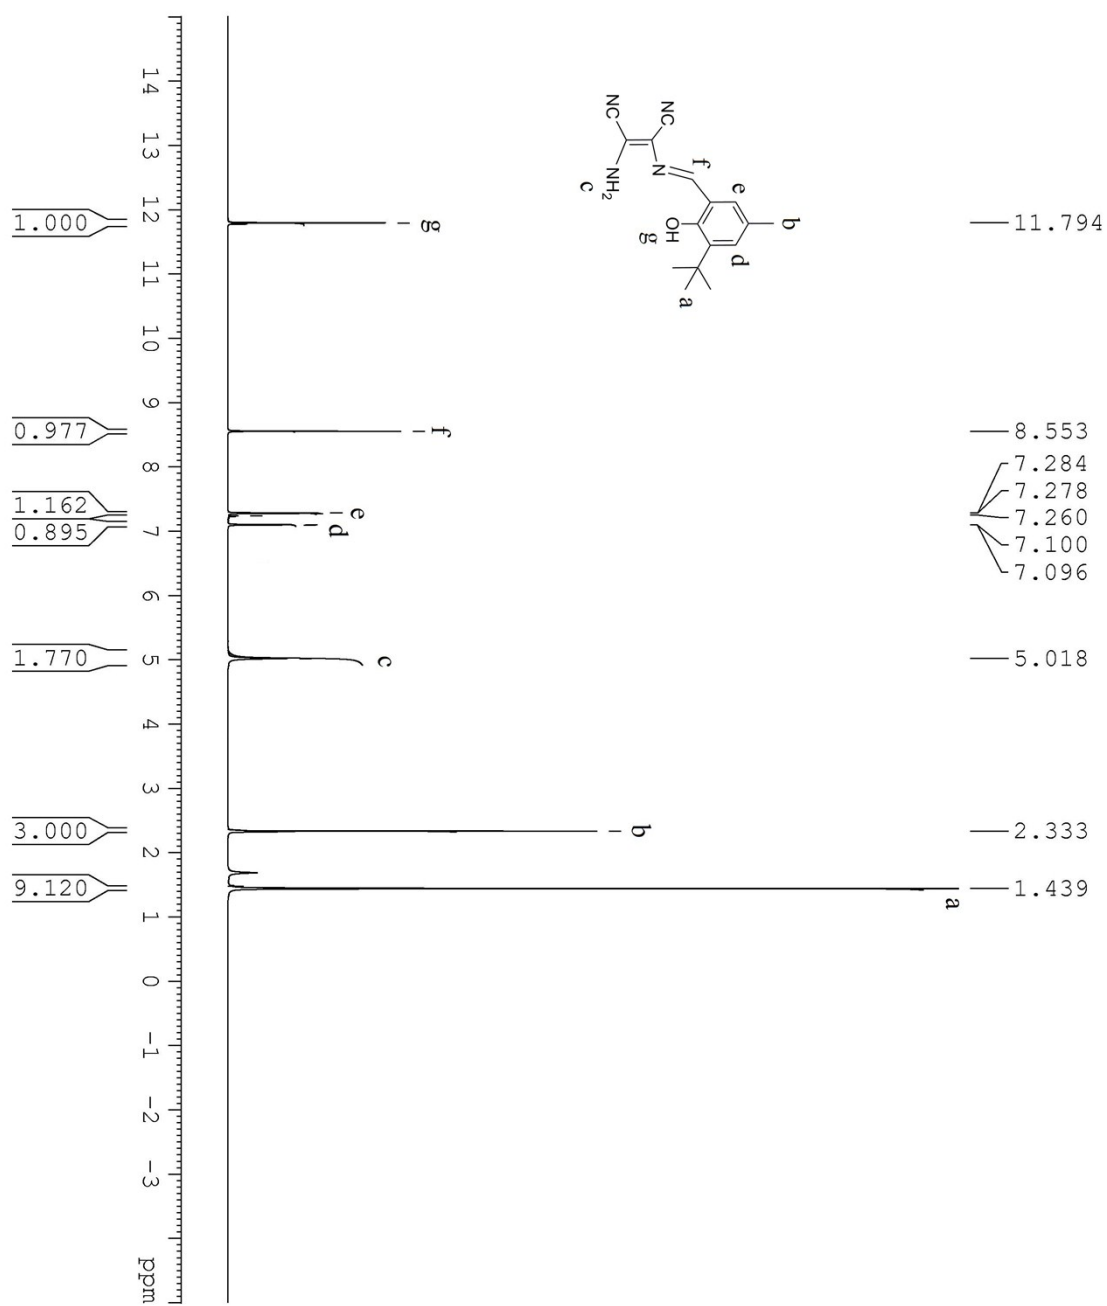

**Fig. S4.** <sup>1</sup>H NMR (400 MHz, CDCl<sub>3</sub>) of L3(H)<sub>2</sub>

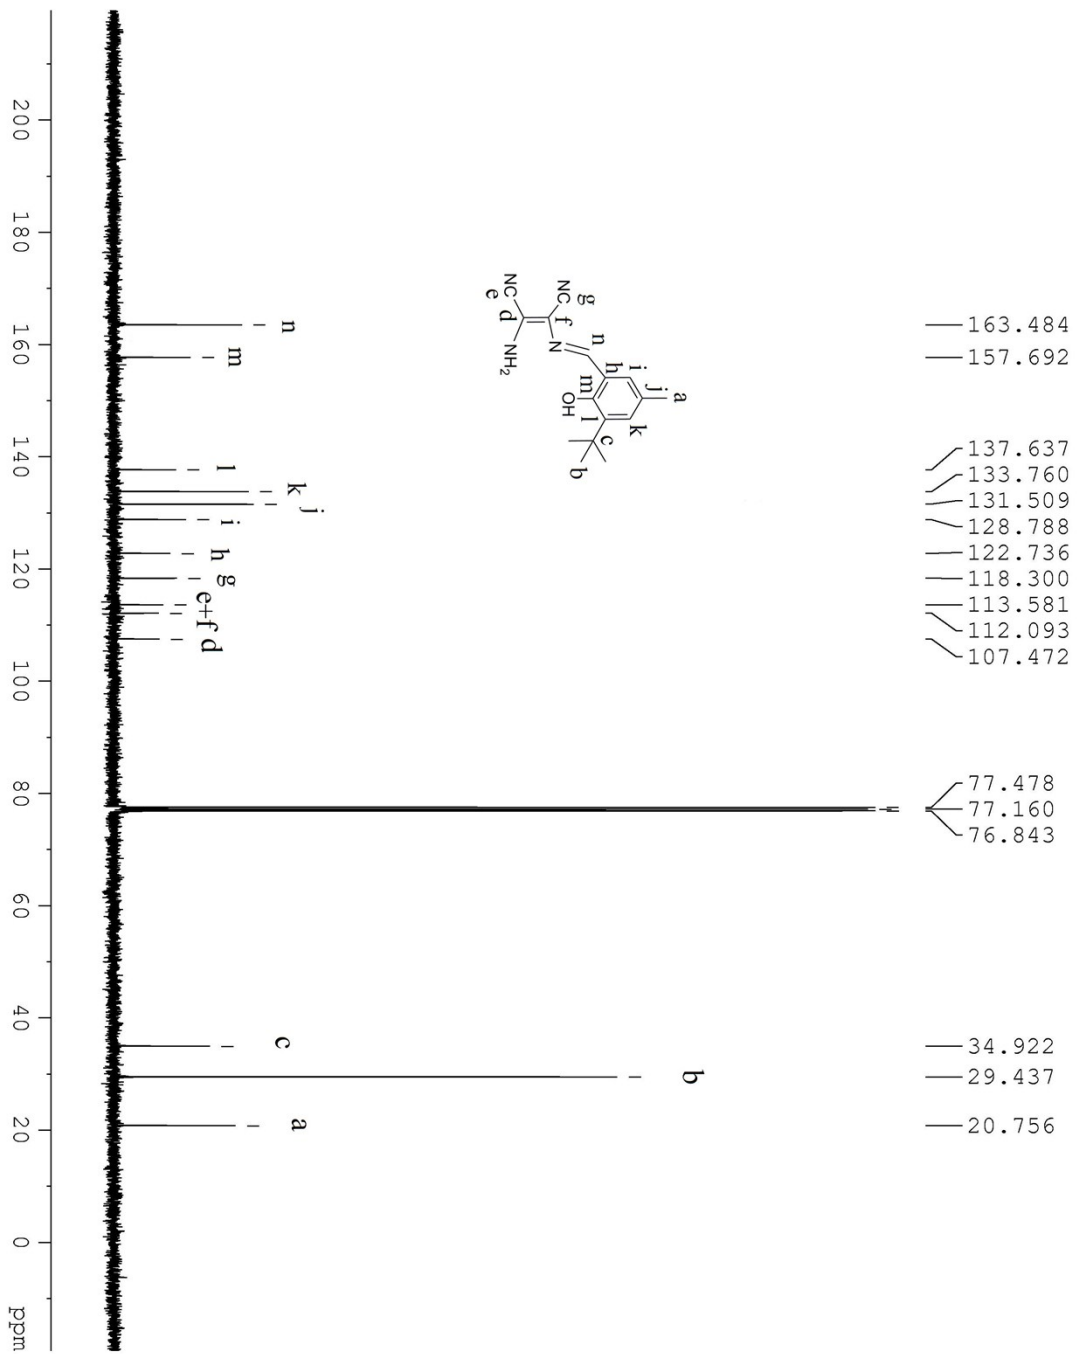

**Fig. S5.** <sup>13</sup>C NMR (100 MHz, CDCl<sub>3</sub>) of **L3(H)<sub>2</sub>**

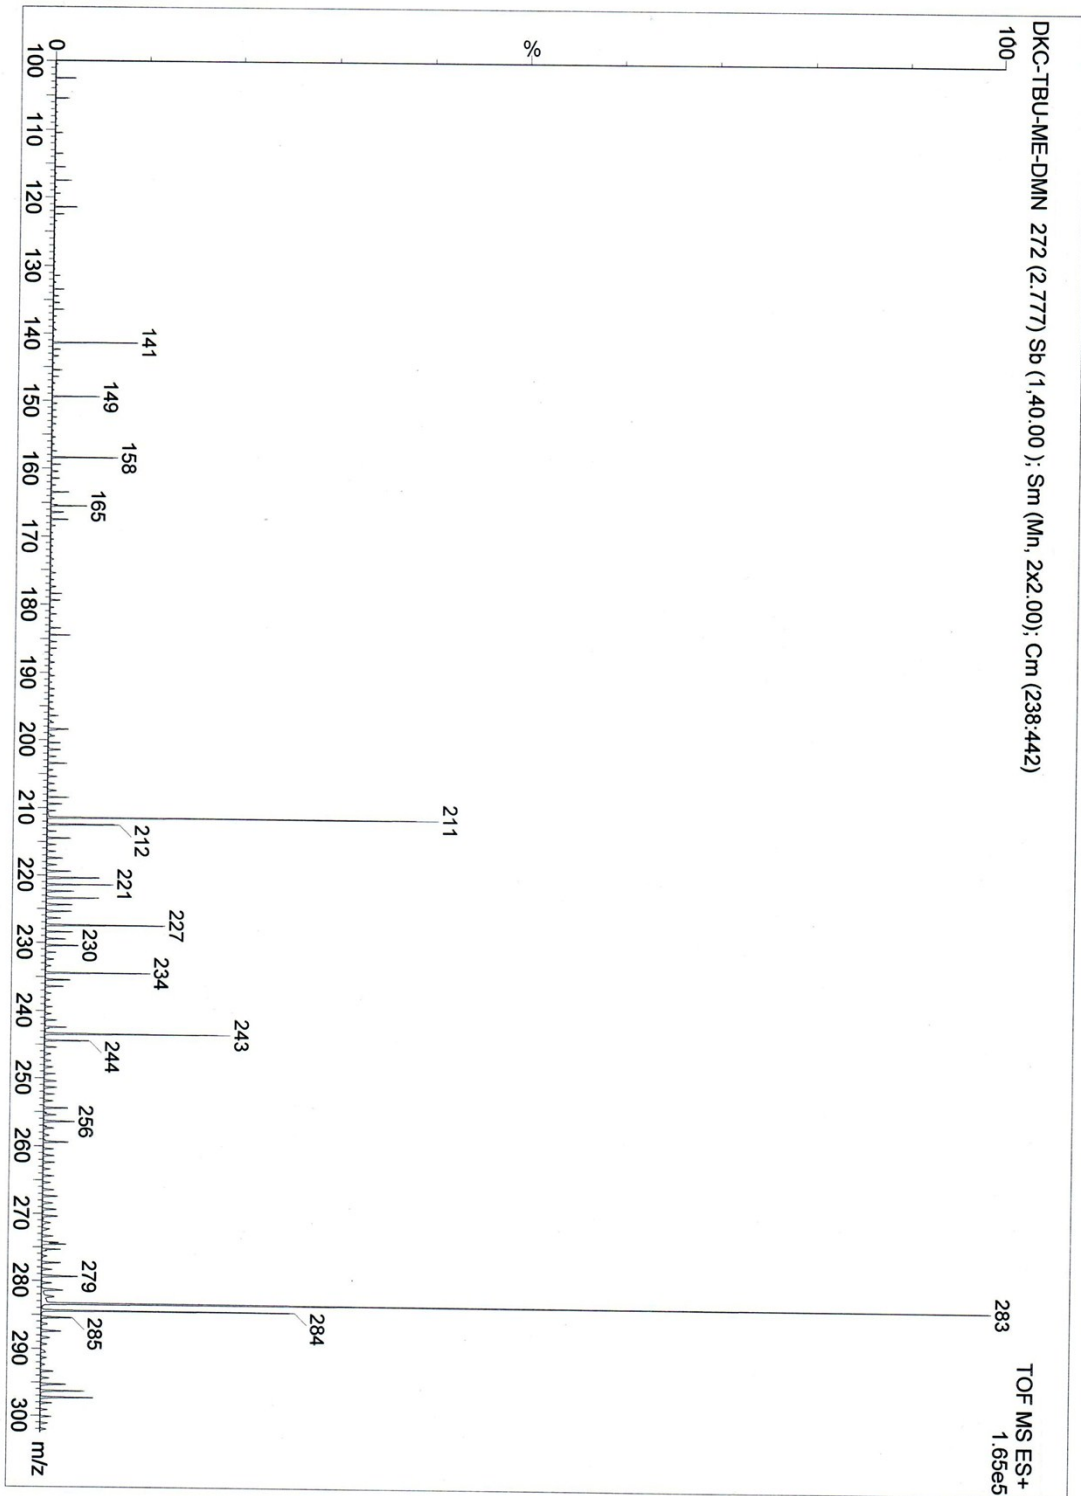

Fig. S6. ESI-MS spectrum of  $L3(H)_2$



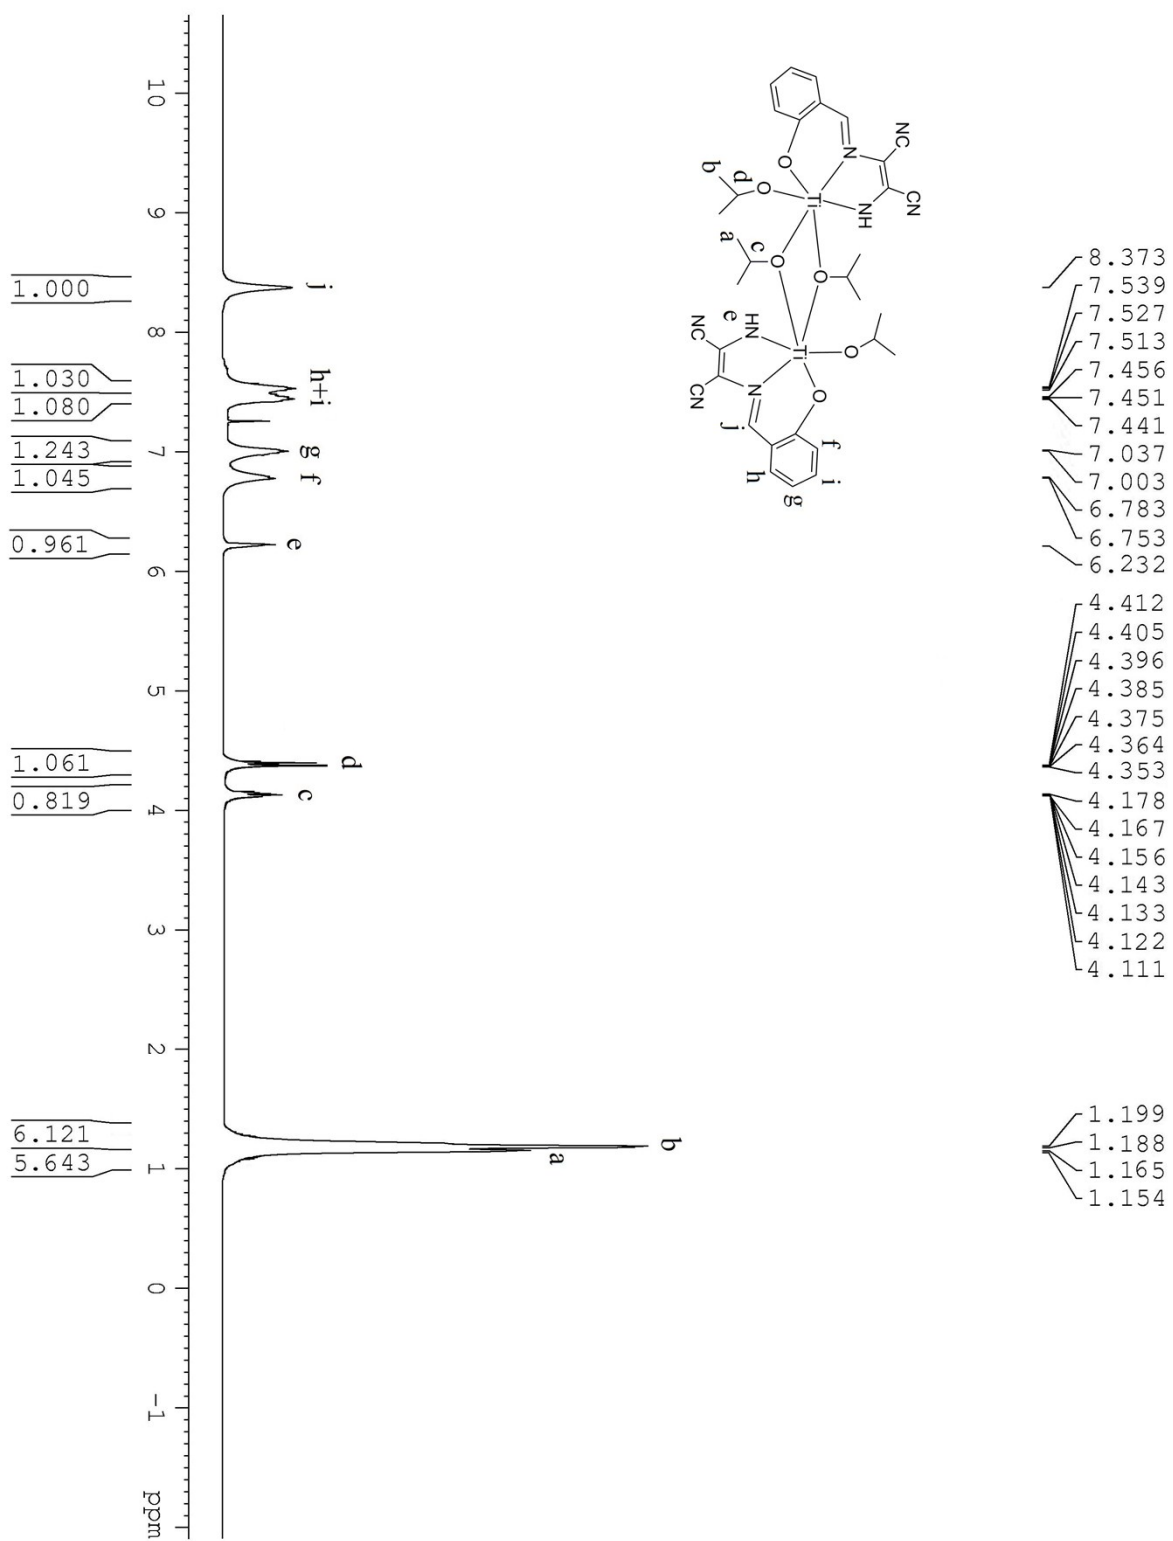

**Fig. S7.** <sup>1</sup>H NMR (500 MHz, CDCl<sub>3</sub>) of **1a**

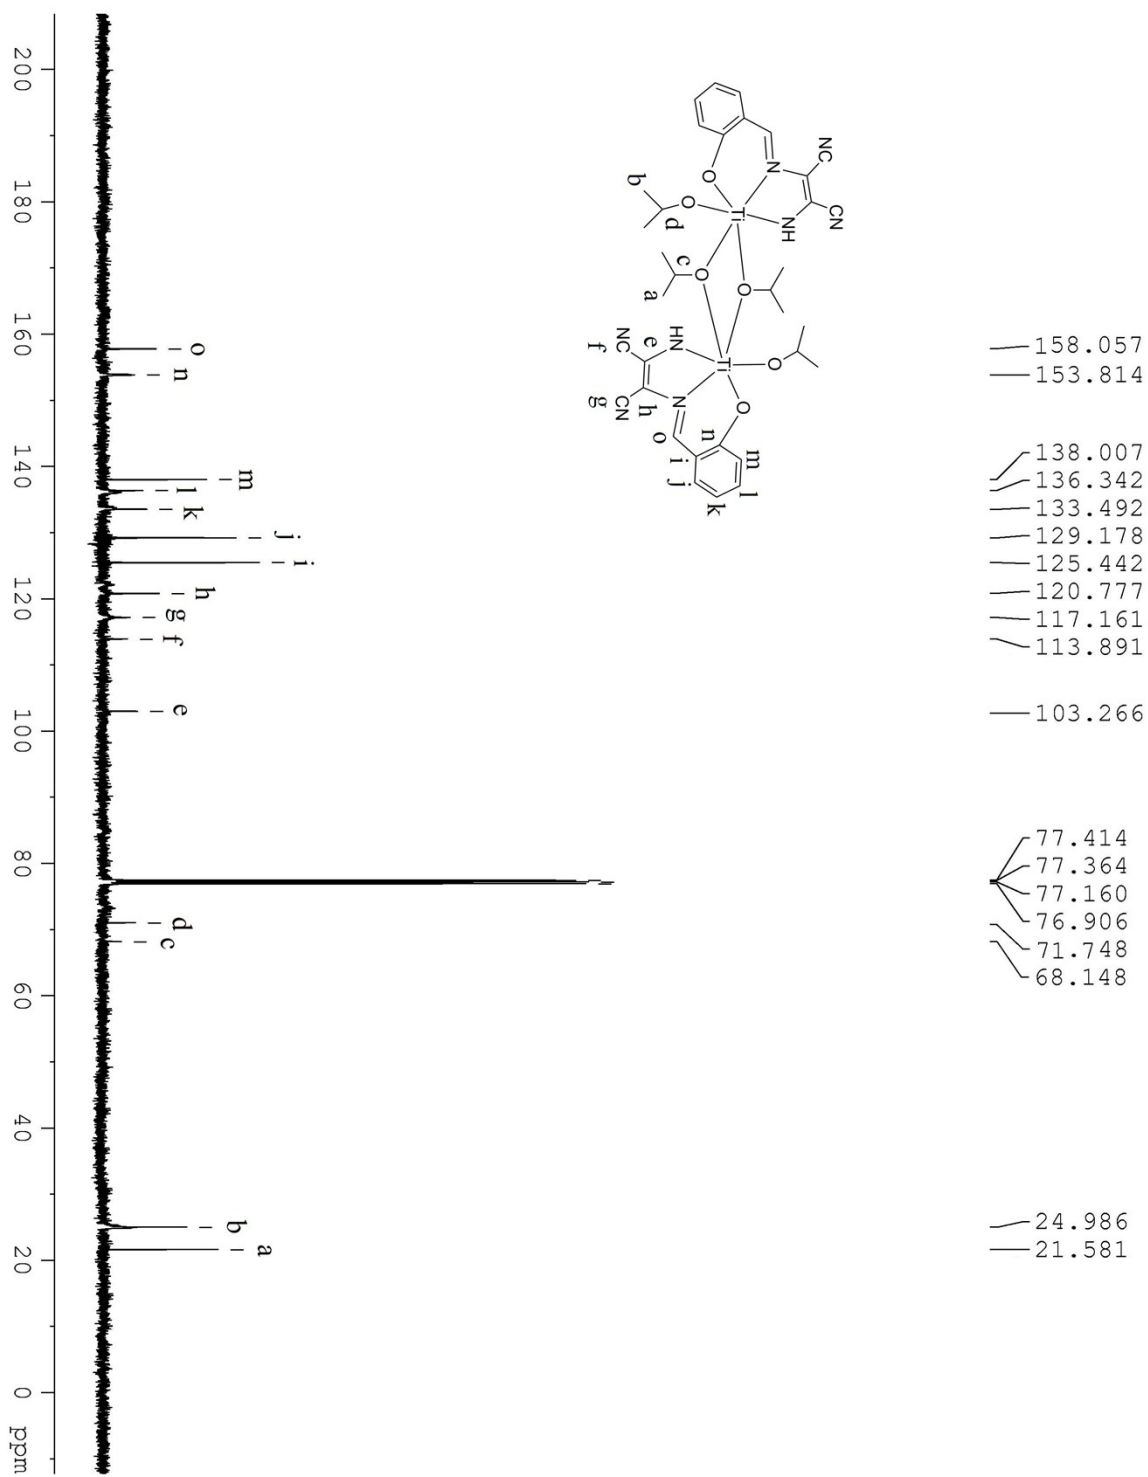

**Fig. S8.**  $^{13}\text{C}$  NMR (125 MHz,  $\text{CDCl}_3$ ) of **1a**

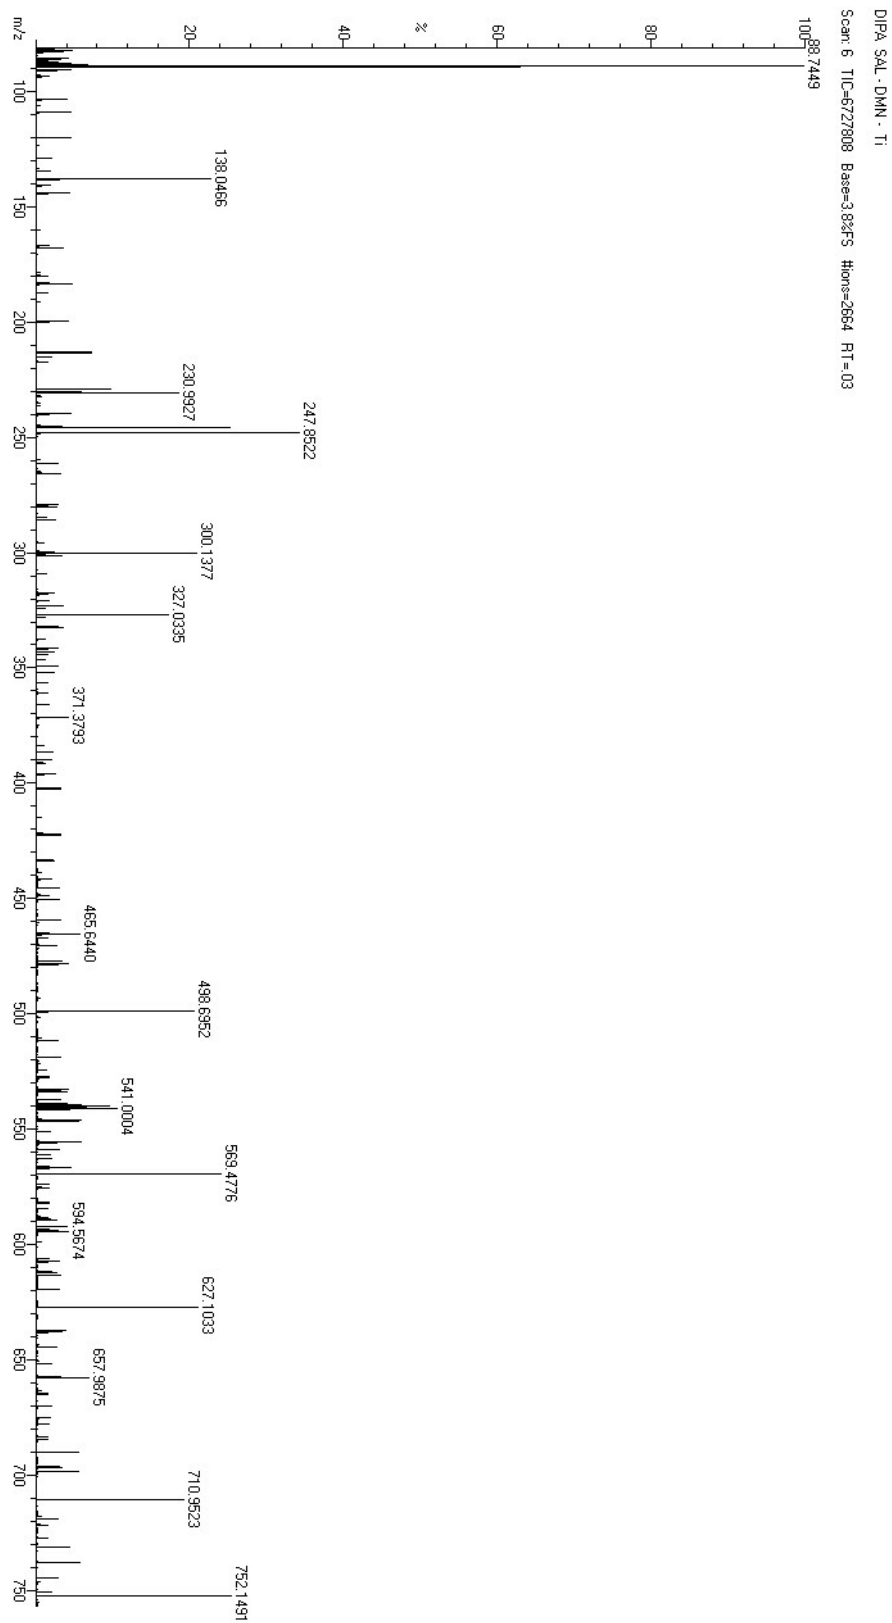

Fig. S9. EI-MS spectrum of 1a

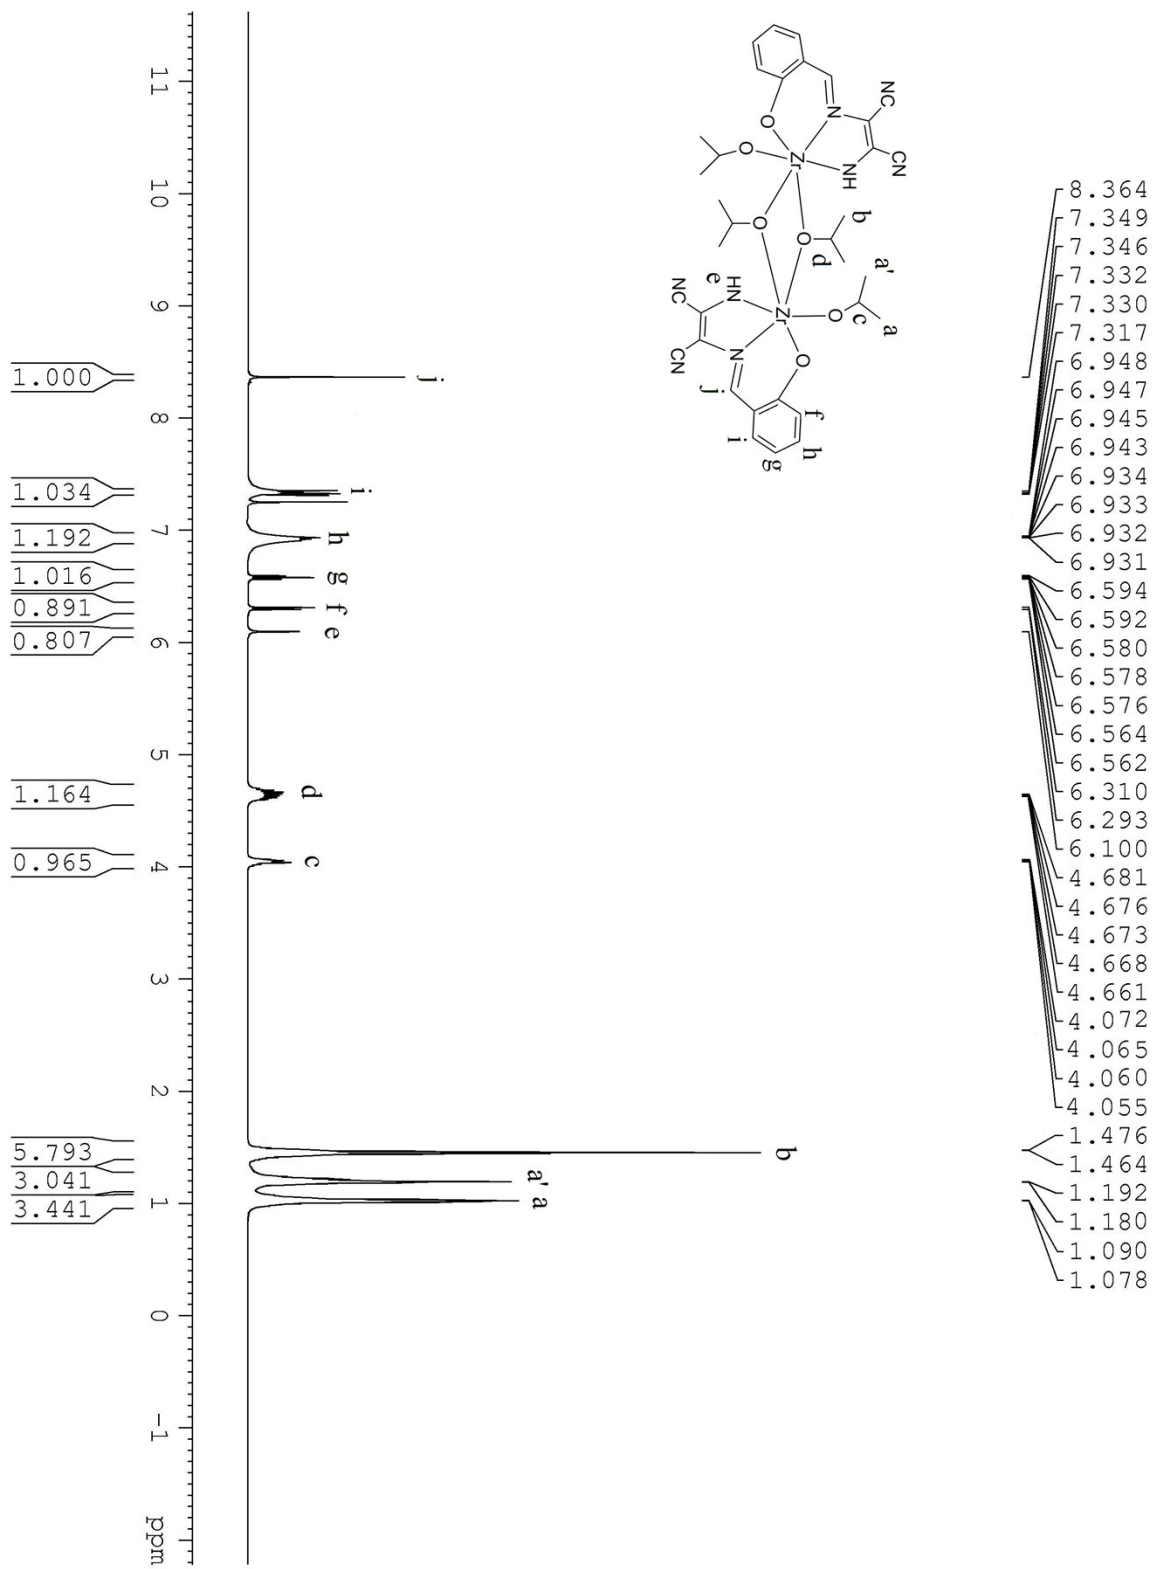

**Fig. S10.** <sup>1</sup>H NMR (500 MHz, CDCl<sub>3</sub>) of **1b**

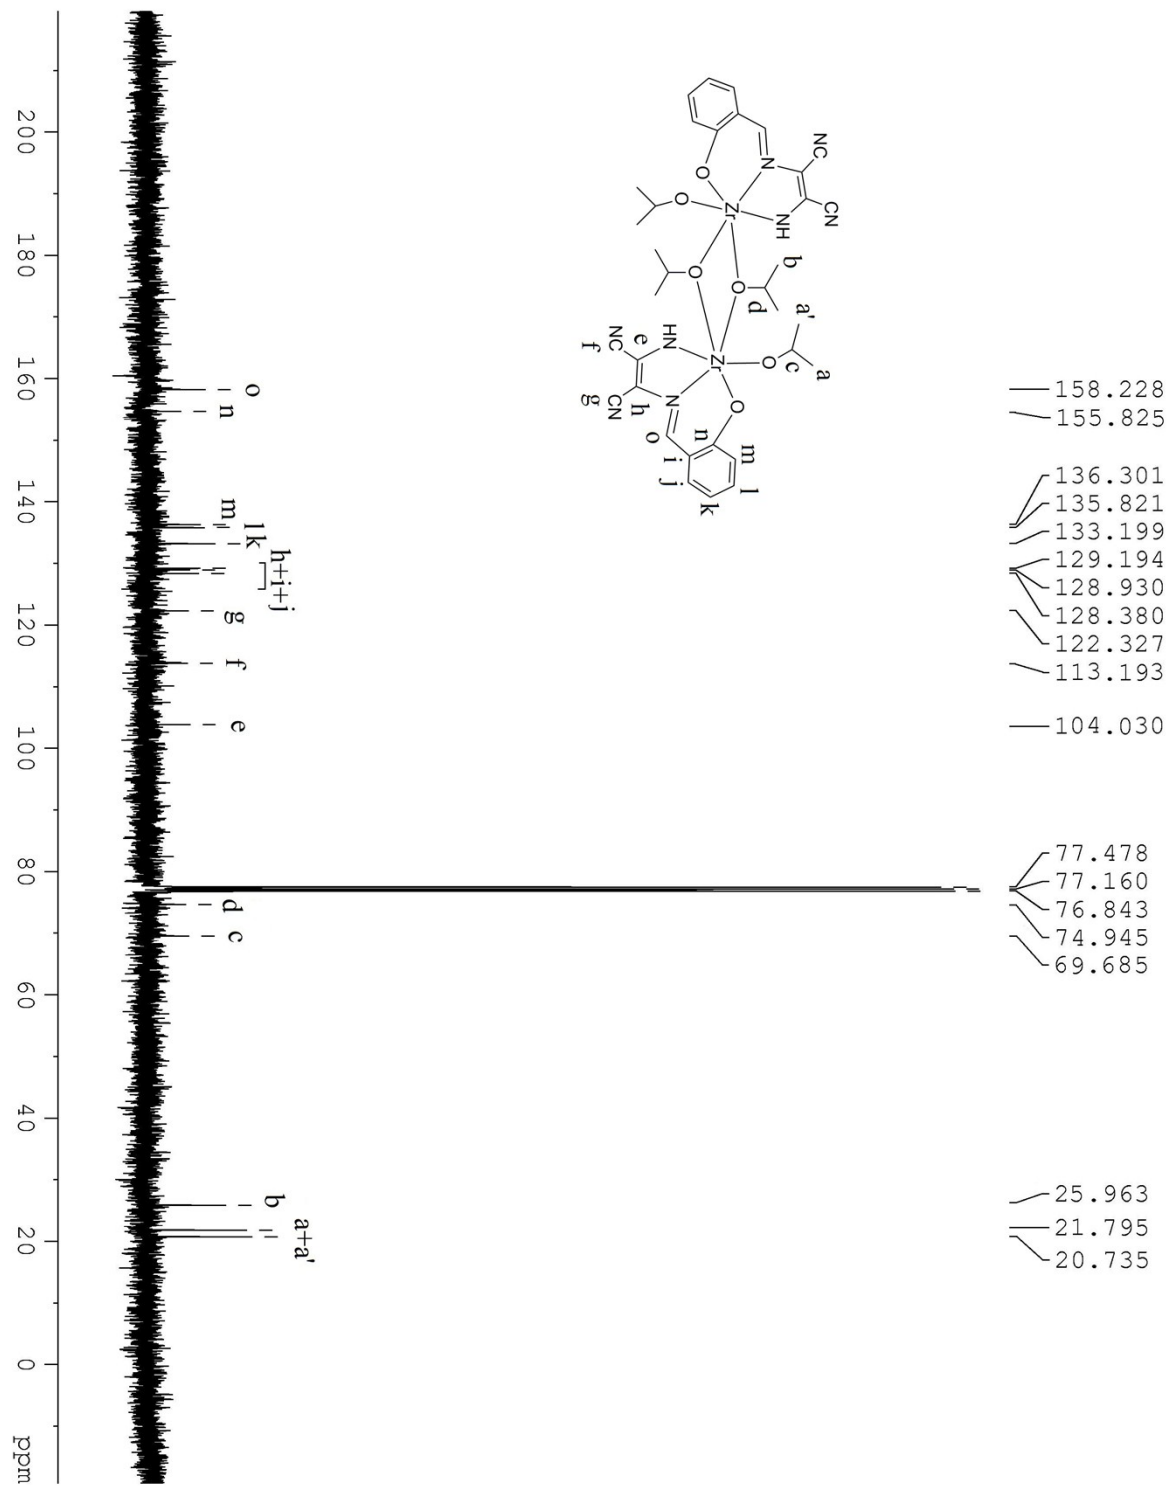

Fig. S11.  $^{13}\text{C}$  NMR (125 MHz,  $\text{CDCl}_3$ ) of **1b**

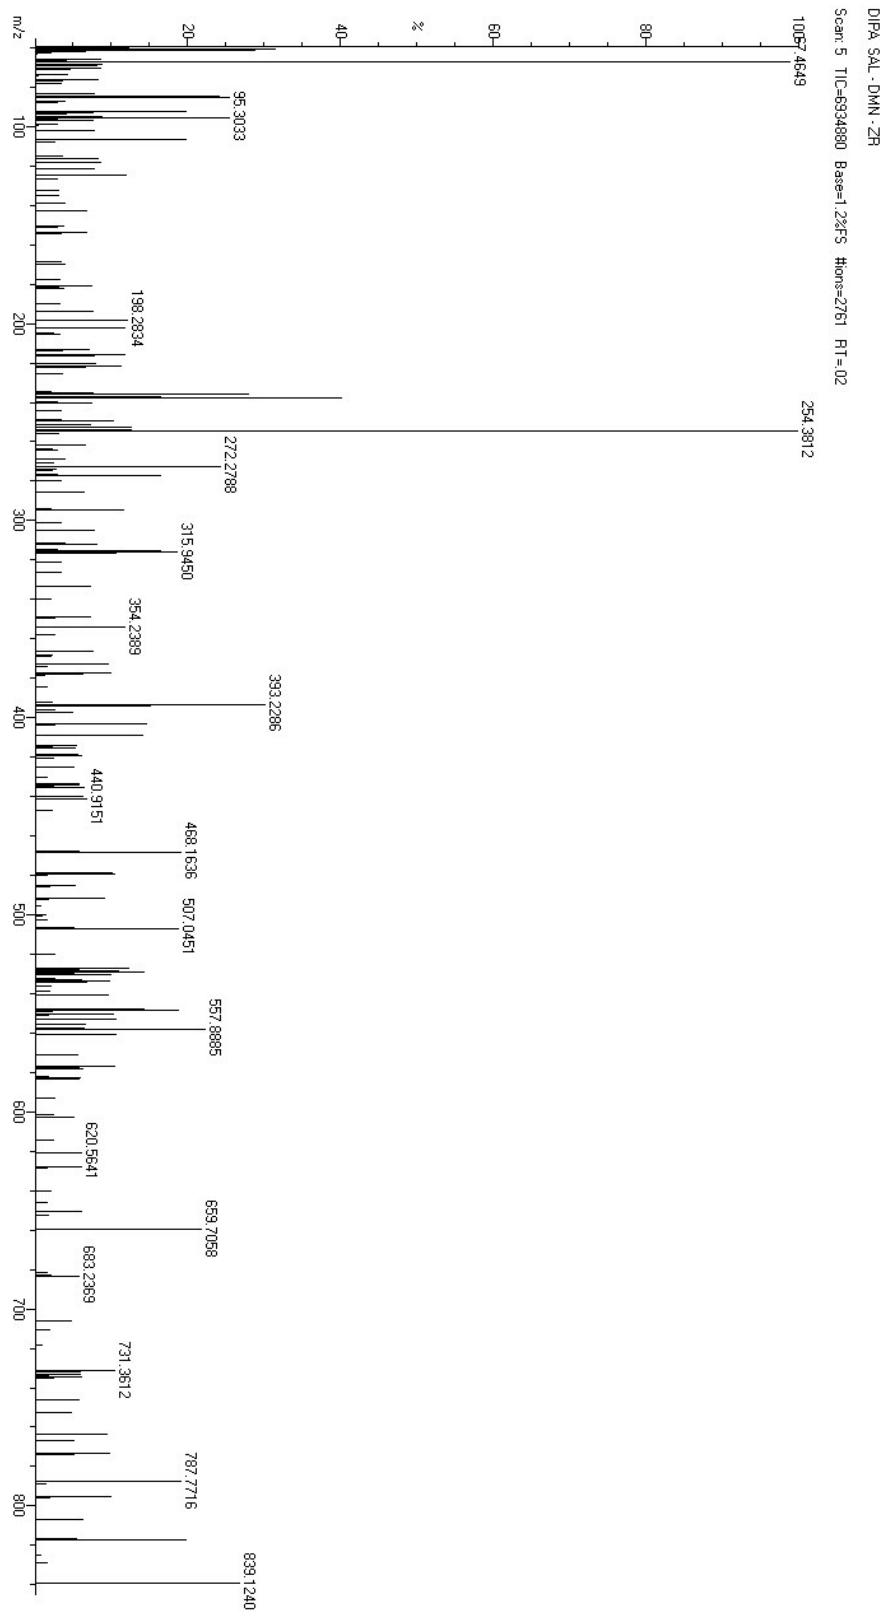

Fig. S12. EI-MS spectrum of **1b**

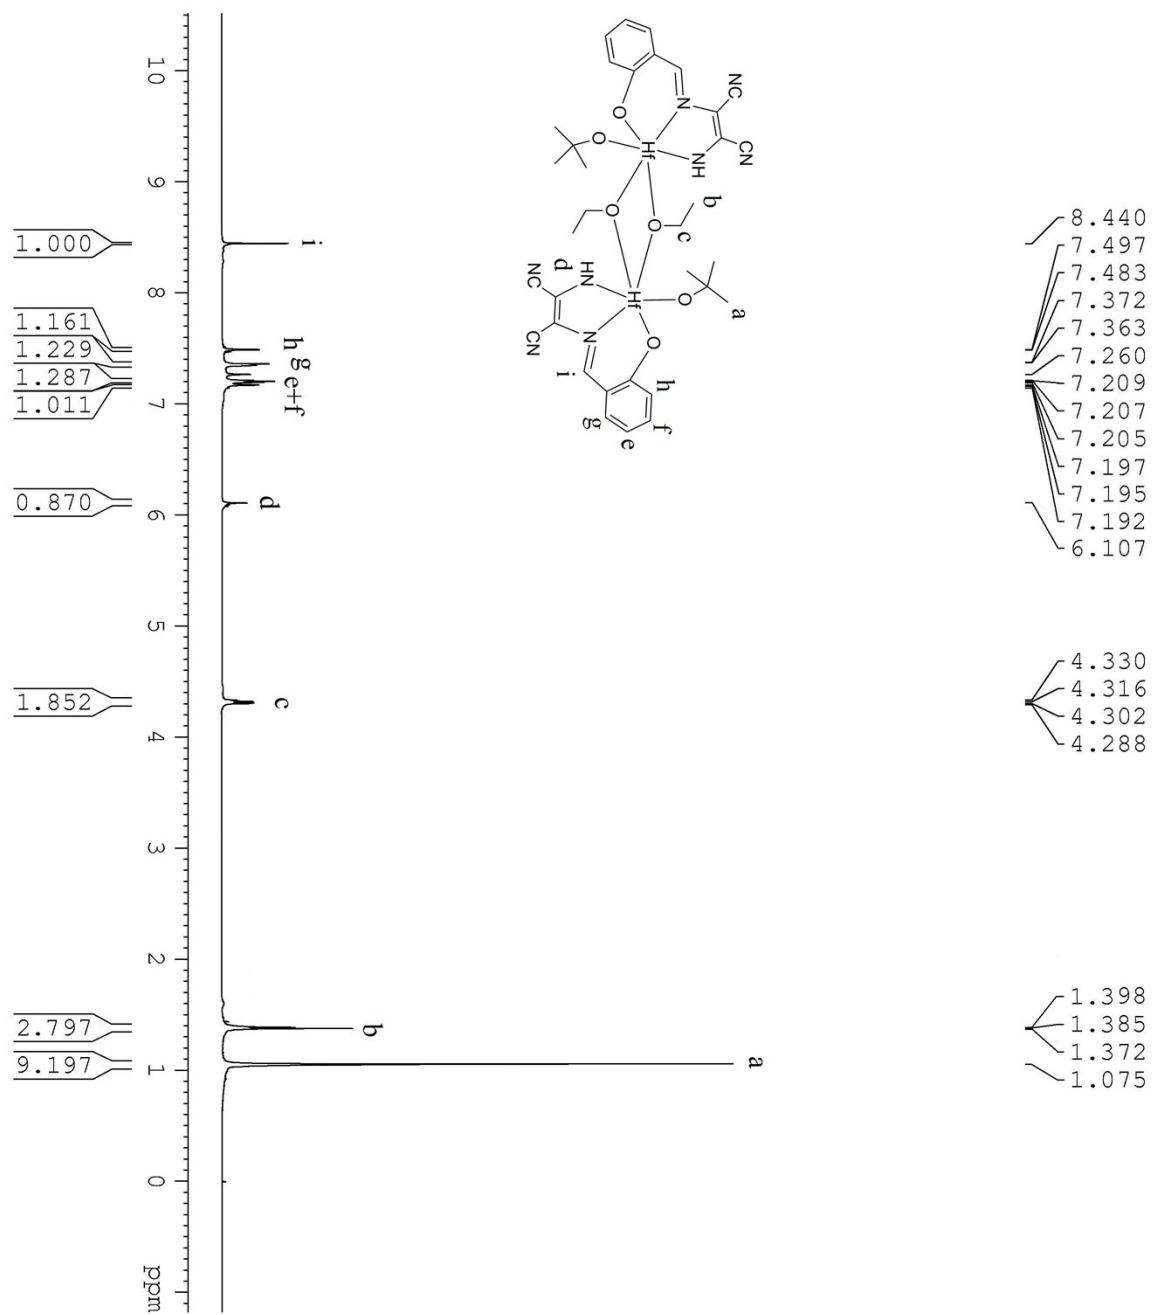

**Fig. S13.**  $^1\text{H}$  NMR (500 MHz,  $\text{CDCl}_3$ ) of **1c**

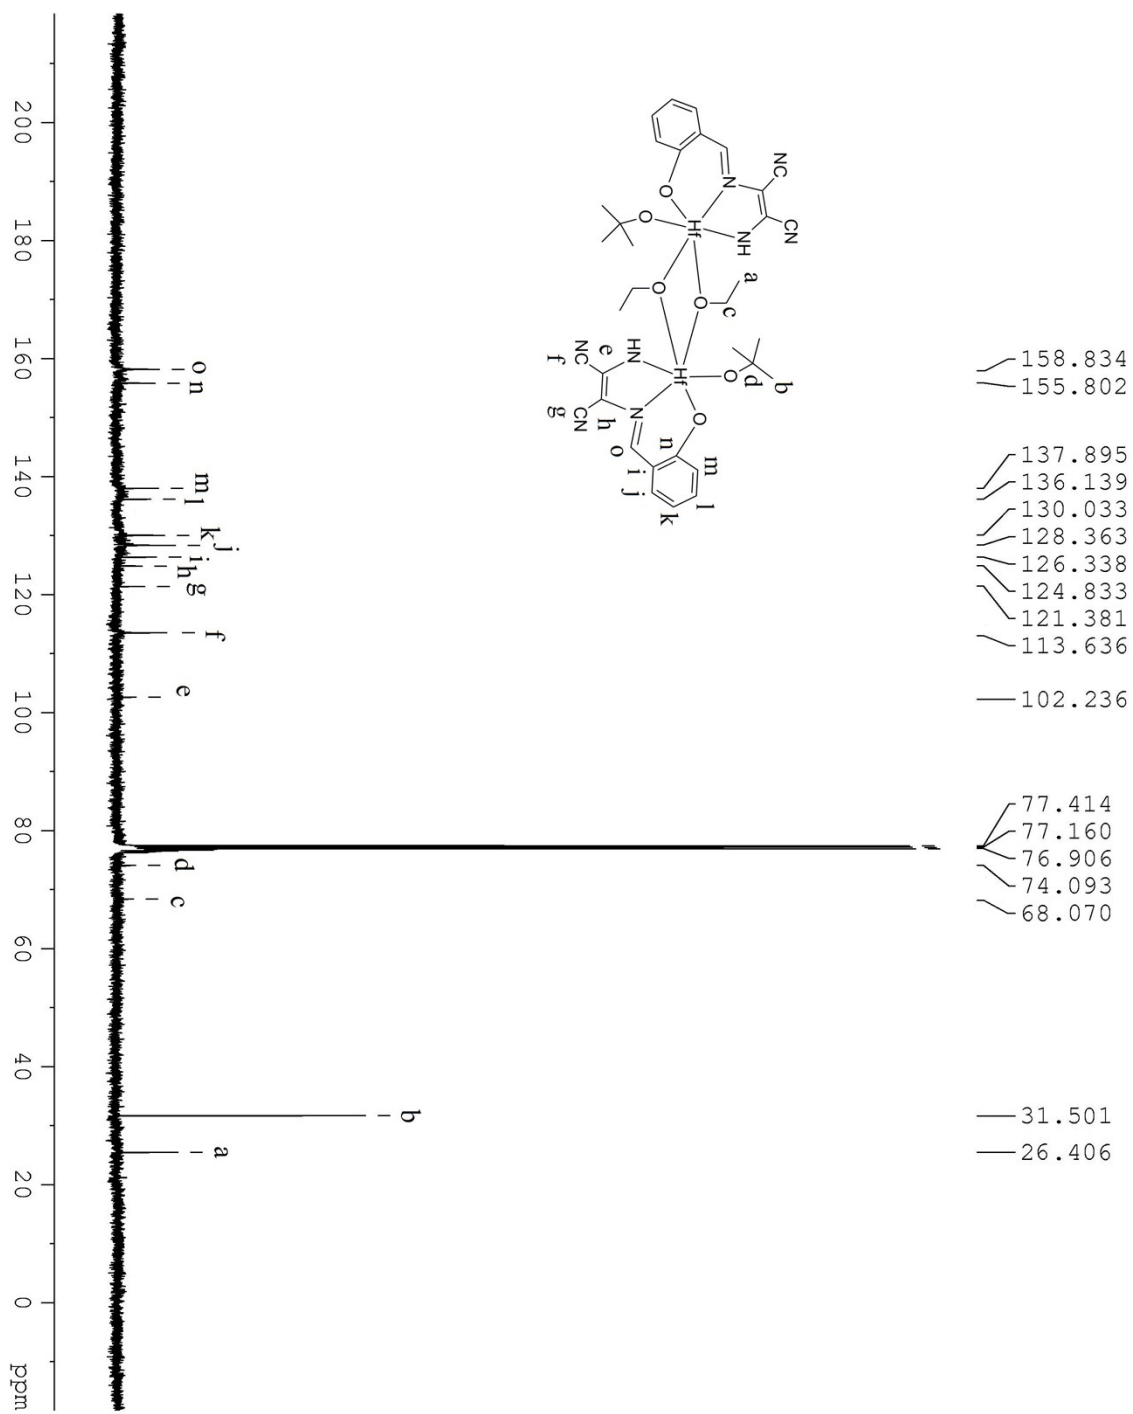

**Fig. S14.**  $^{13}\text{C}$  NMR (125 MHz,  $\text{CDCl}_3$ ) of **1c**



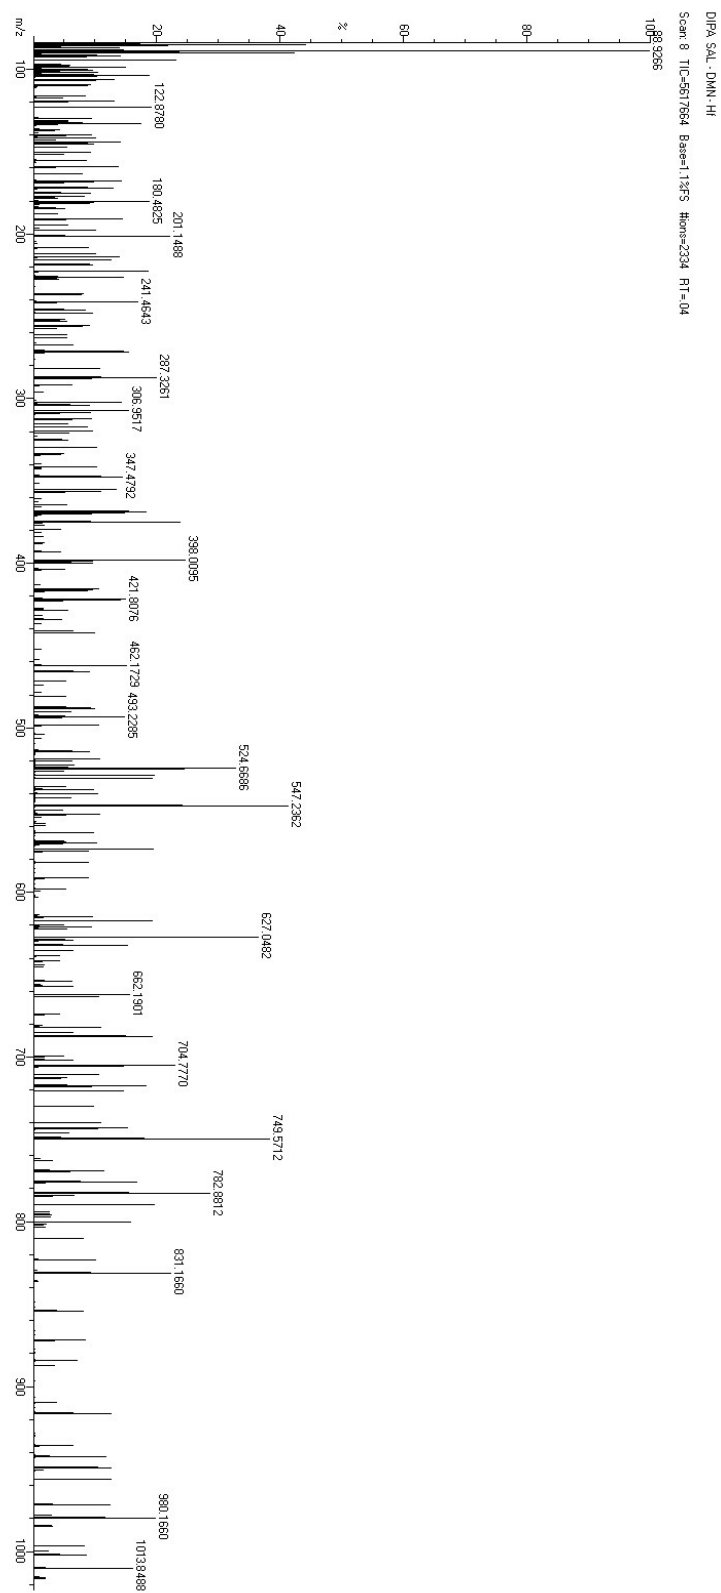

**Fig. S15.** EI-MS spectrum of **1c**

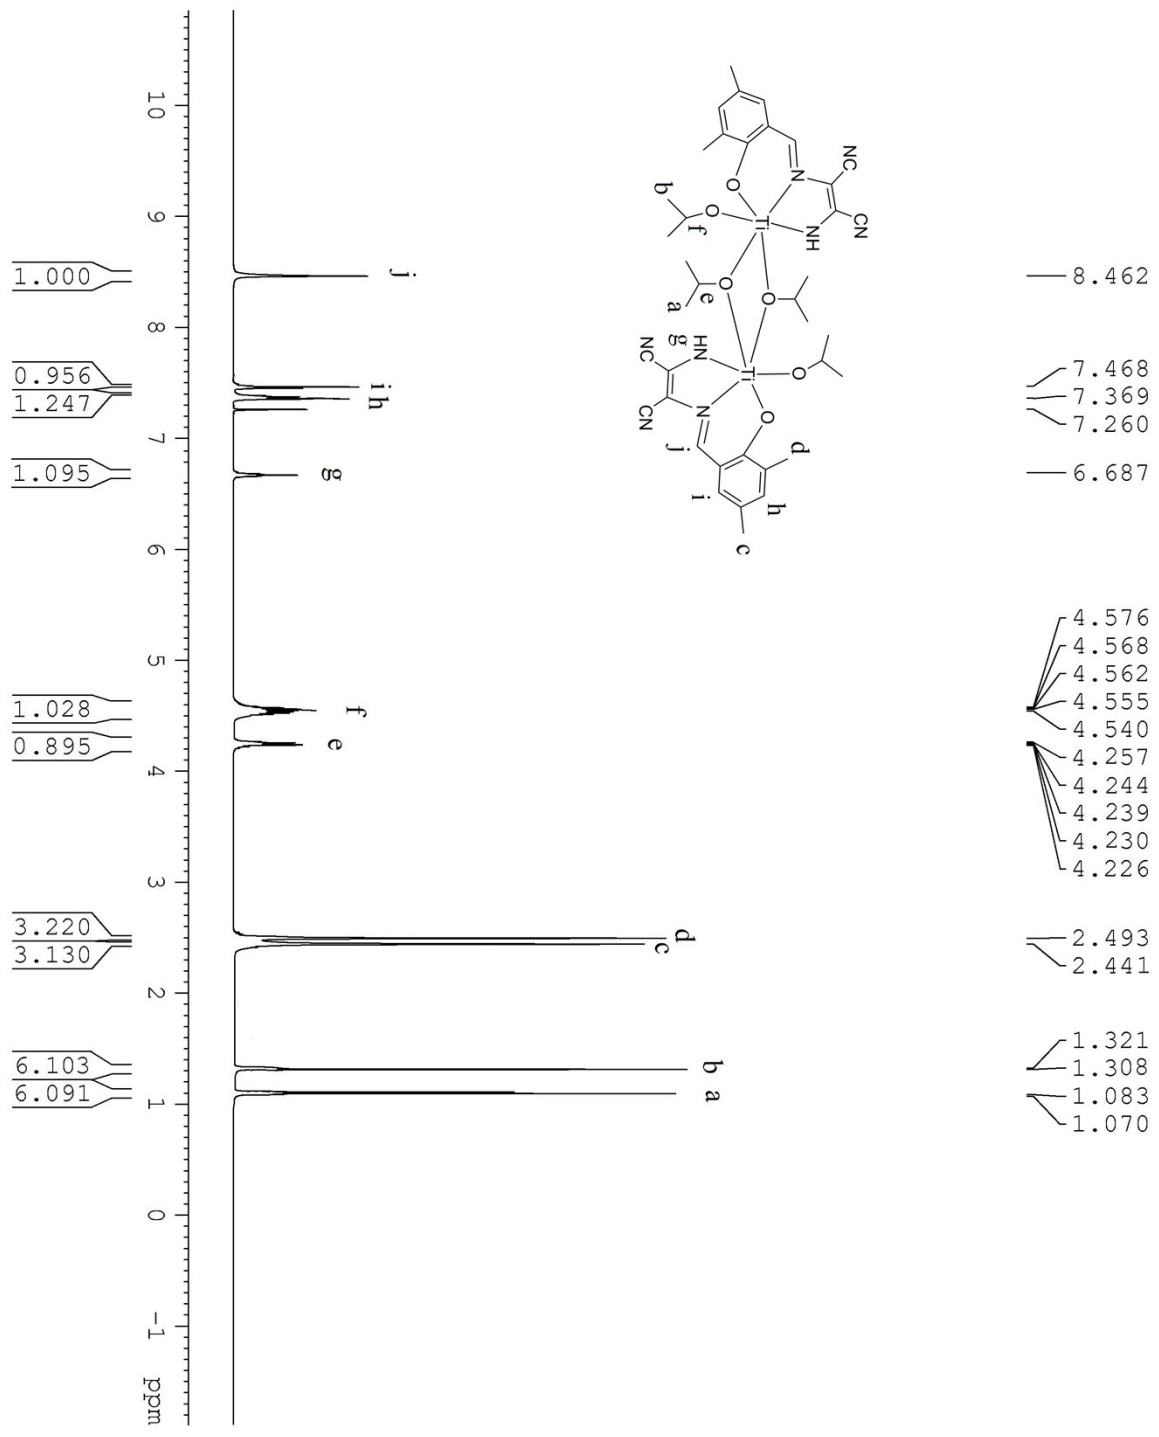

**Fig. S16.** <sup>1</sup>H NMR (500 MHz, CDCl<sub>3</sub>) of **2a**

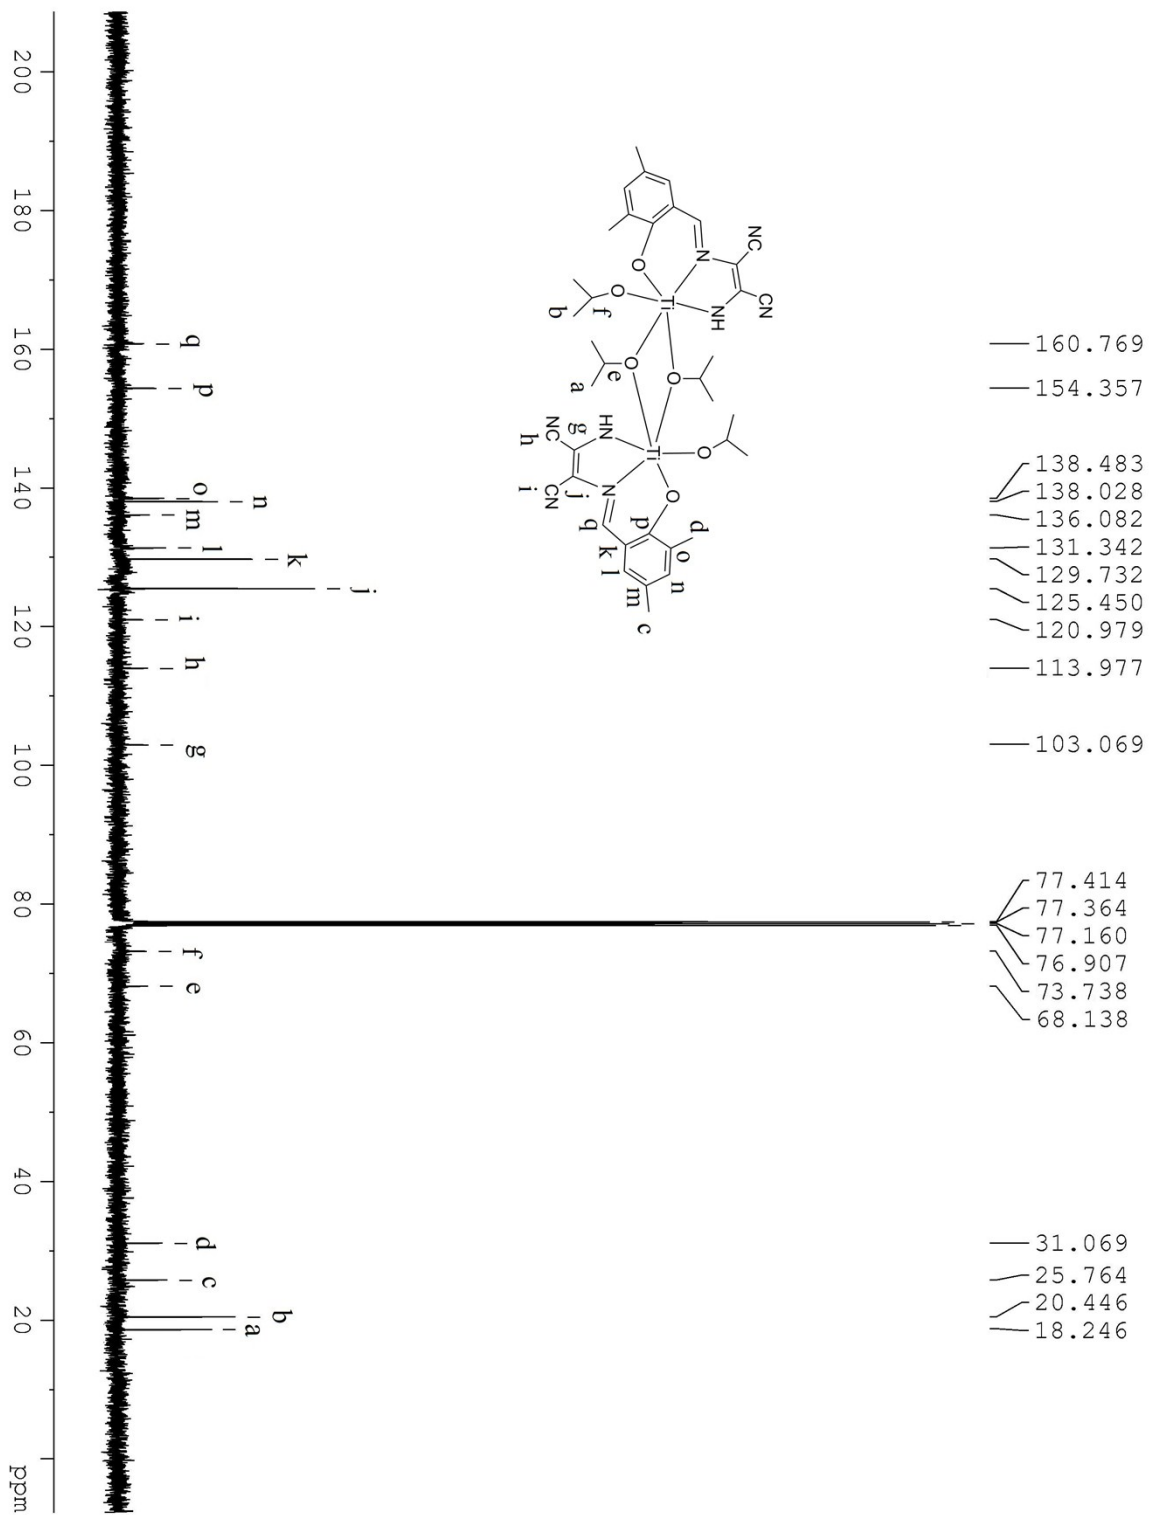

**Fig. S17.**  $^{13}\text{C}$  NMR (125 MHz,  $\text{CDCl}_3$ ) of **2a**

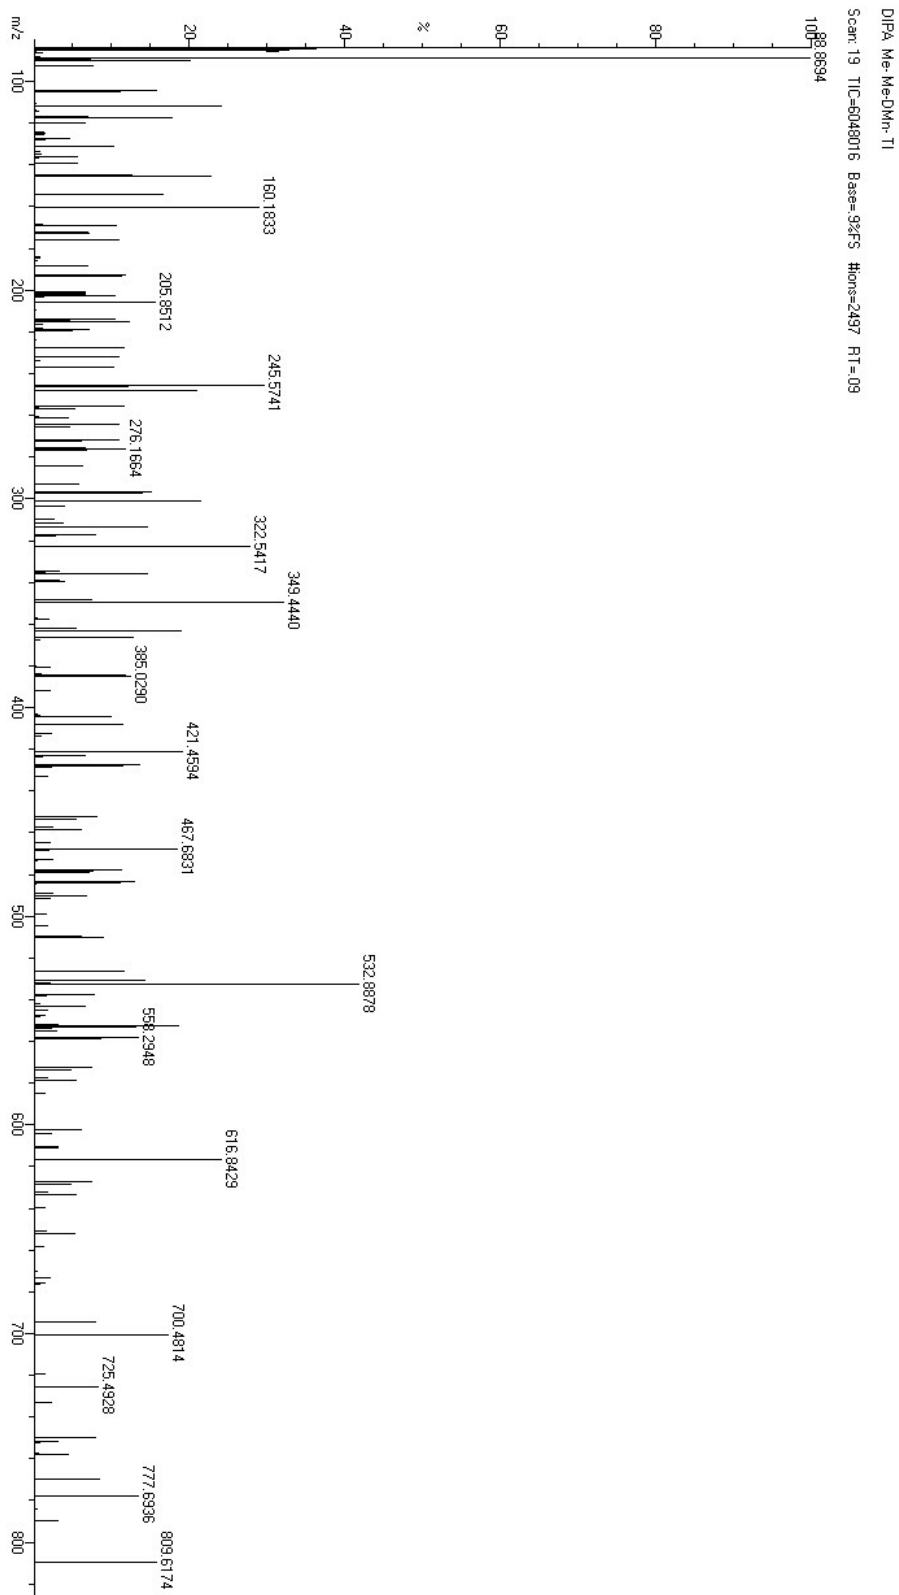

Fig. S18. EI-MS spectrum of 2a

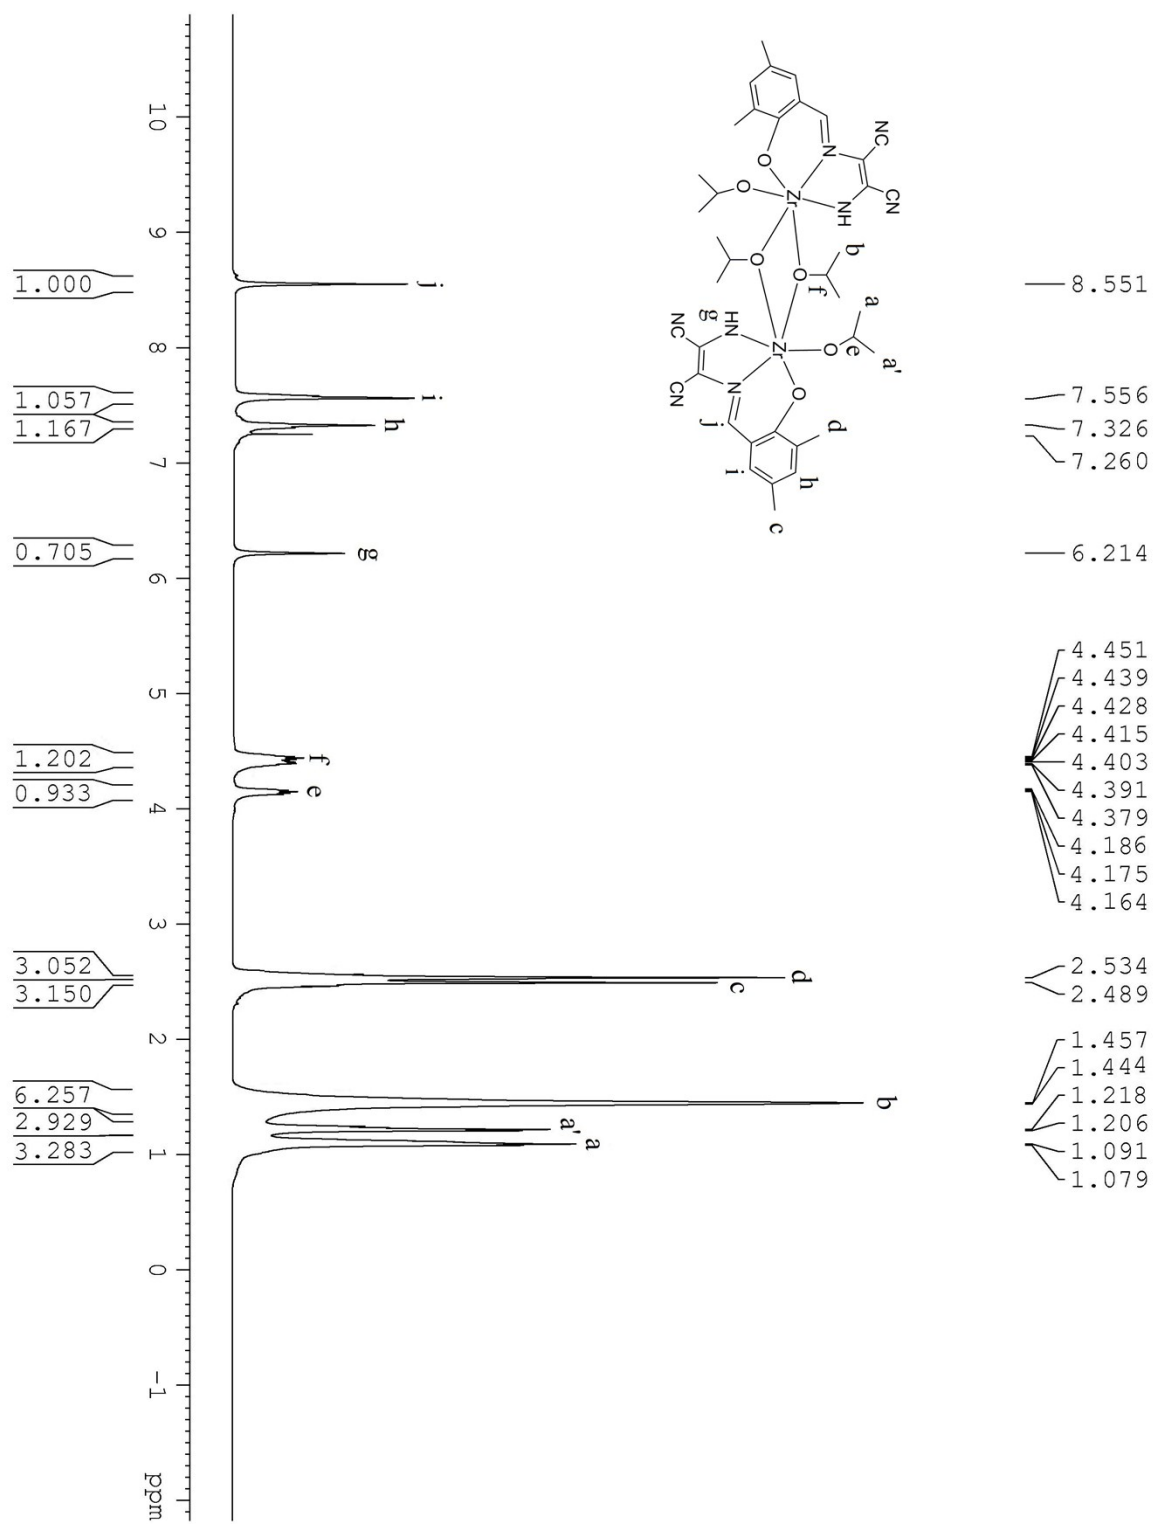

**Fig. S19.**  $^1\text{H}$  NMR (500 MHz,  $\text{CDCl}_3$ ) of **2b**

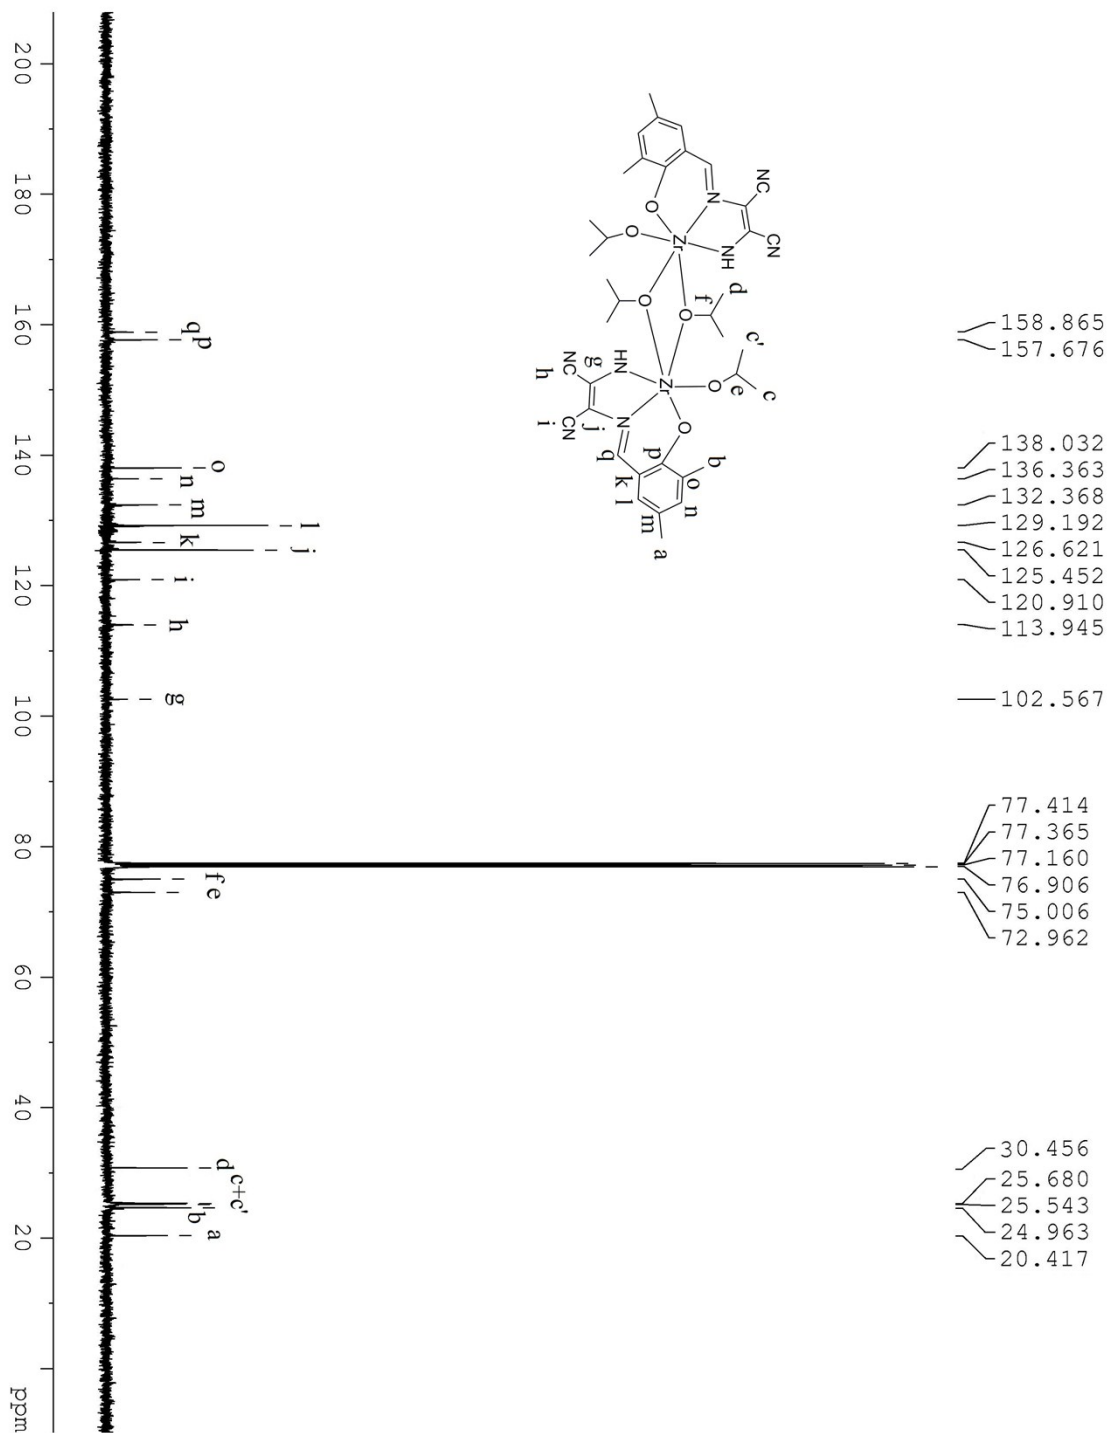

**Fig. S20.**  $^{13}\text{C}$  NMR (125 MHz,  $\text{CDCl}_3$ ) of **2b**

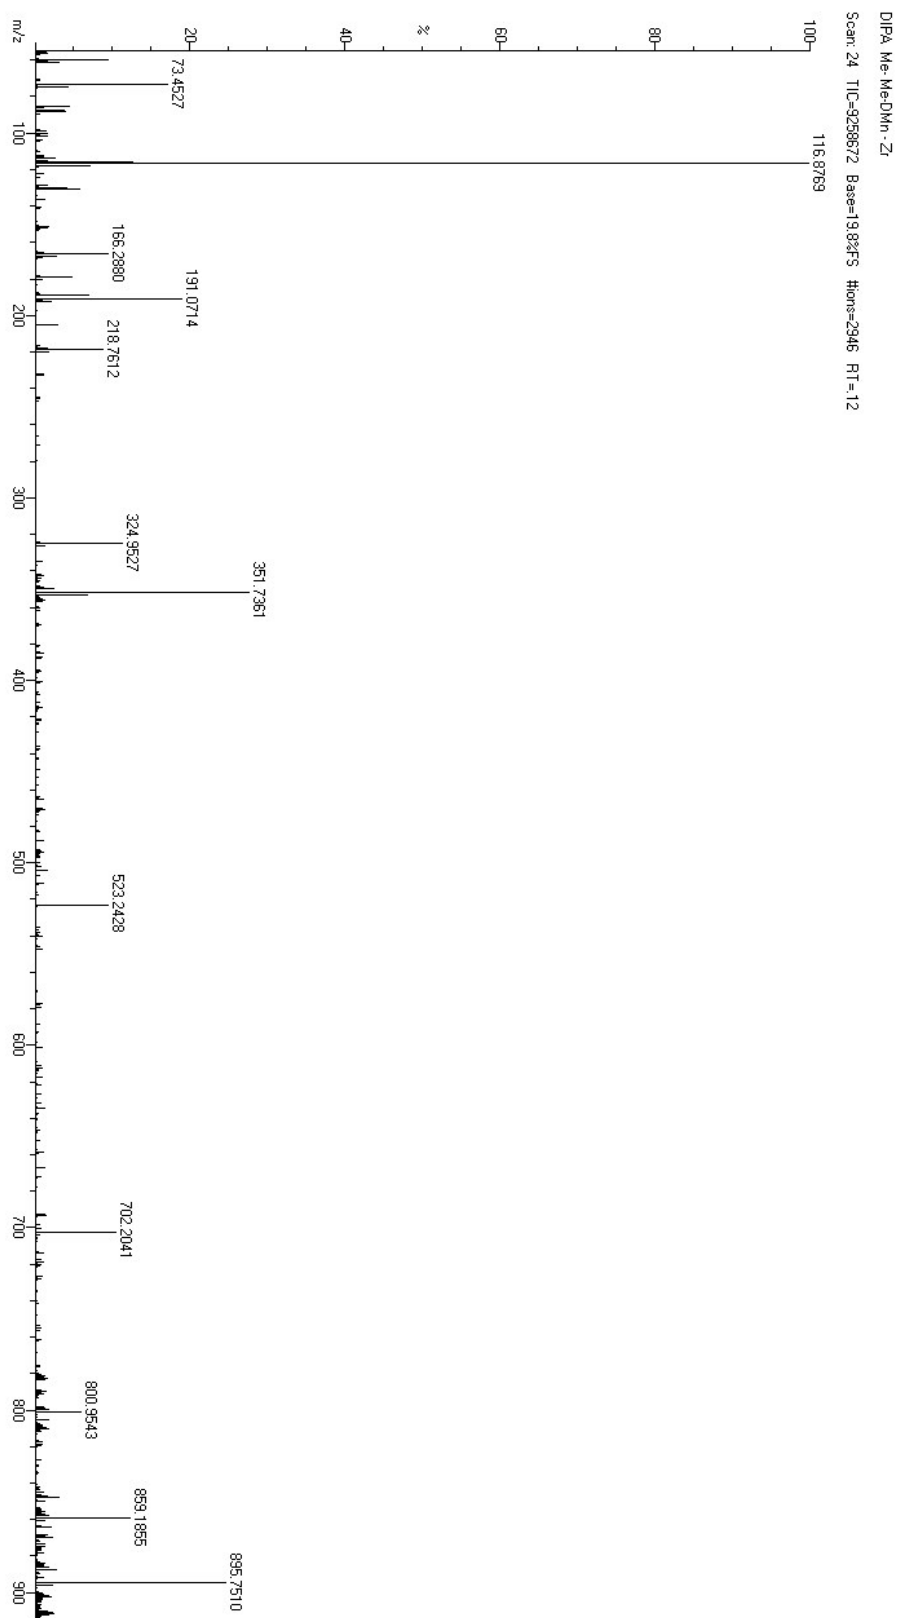

Fig. S21. EI-MS spectrum of **2b**

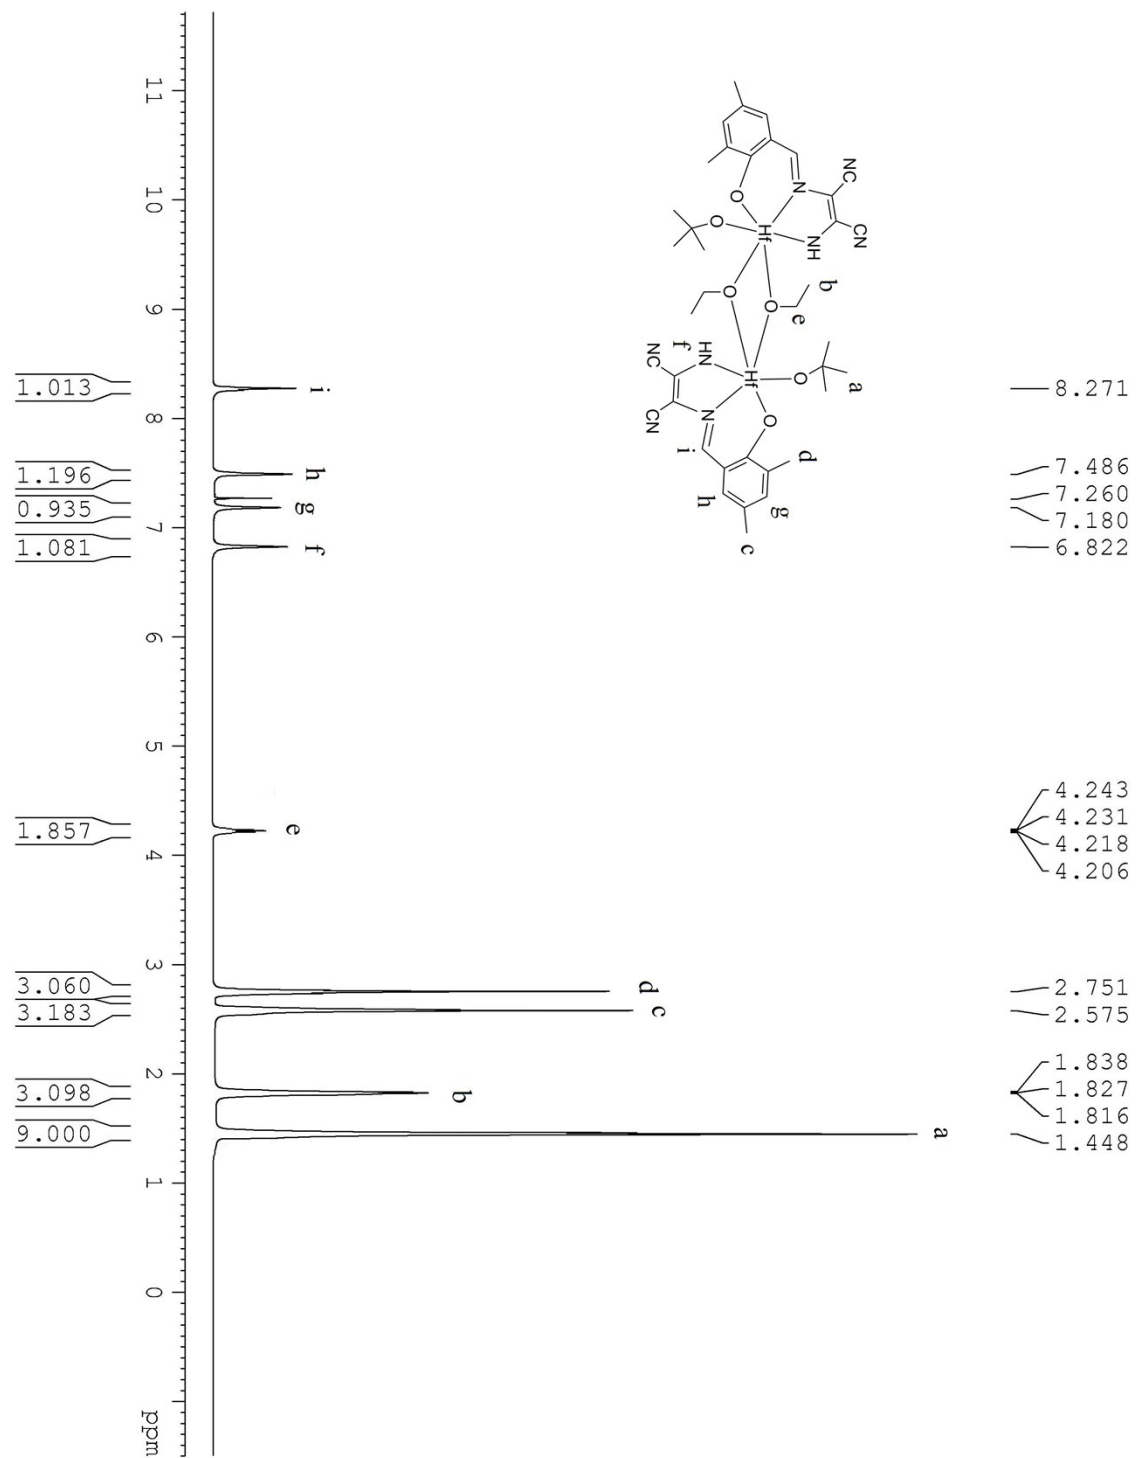

**Fig. S22.** <sup>1</sup>H NMR (500 MHz, CDCl<sub>3</sub>) of **2c**



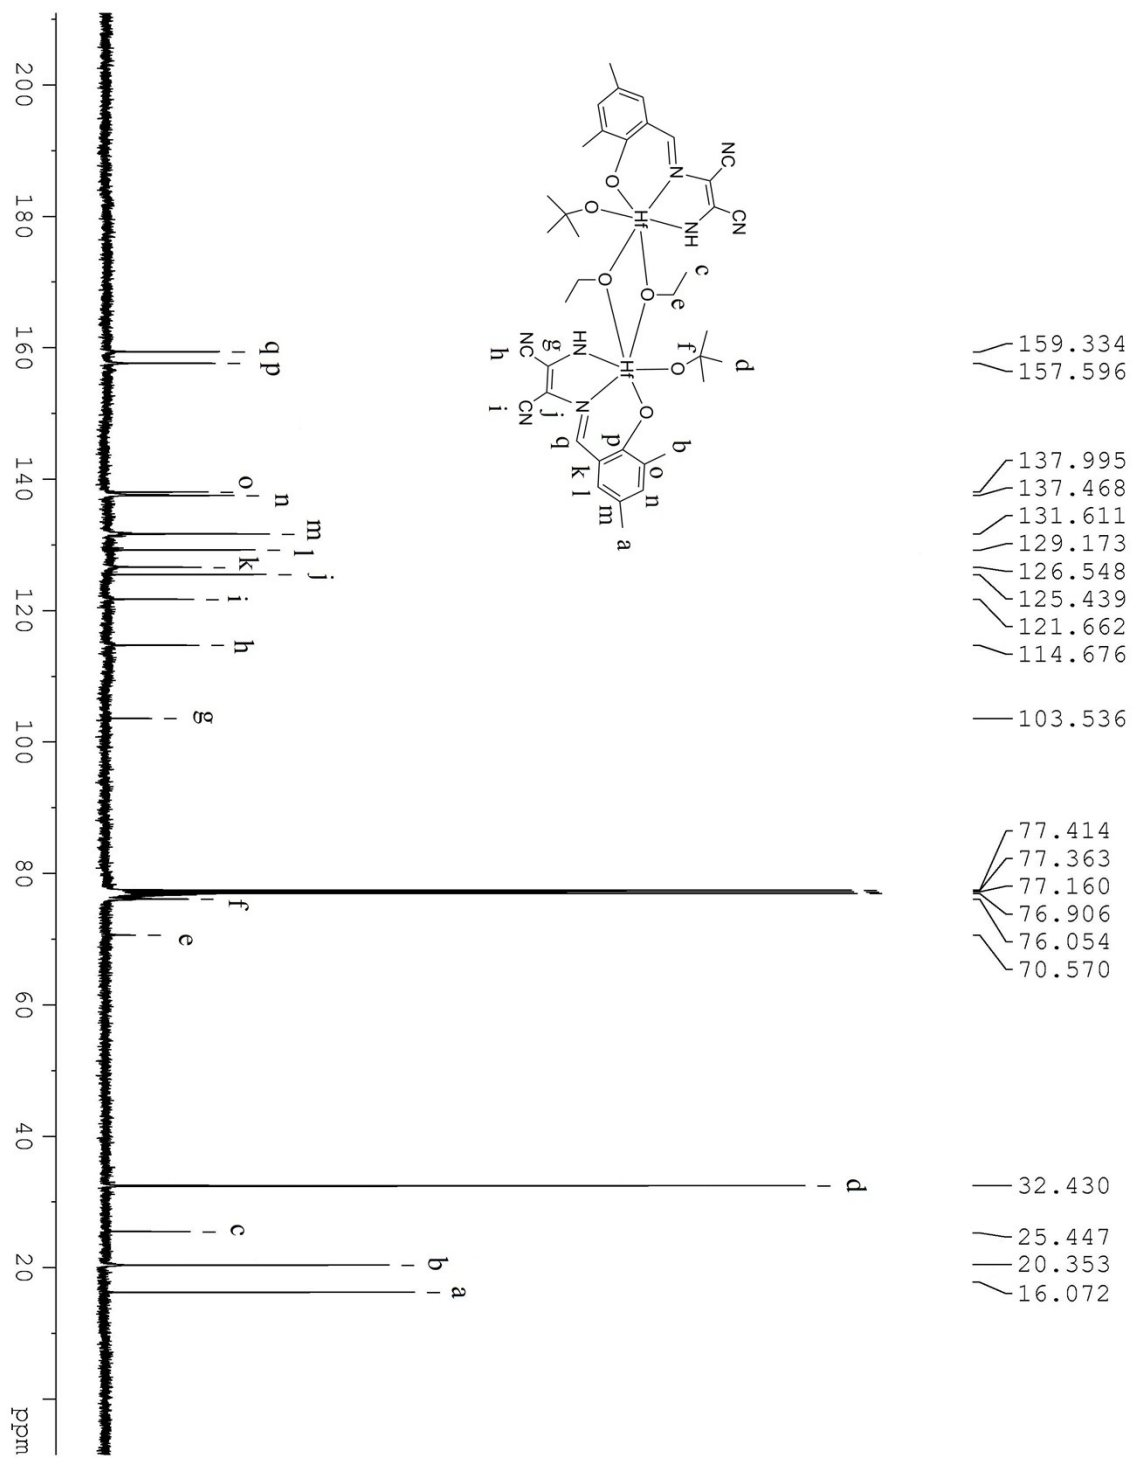

**Fig. S23.**  $^{13}\text{C}$  NMR (125 MHz,  $\text{CDCl}_3$ ) of **2c**

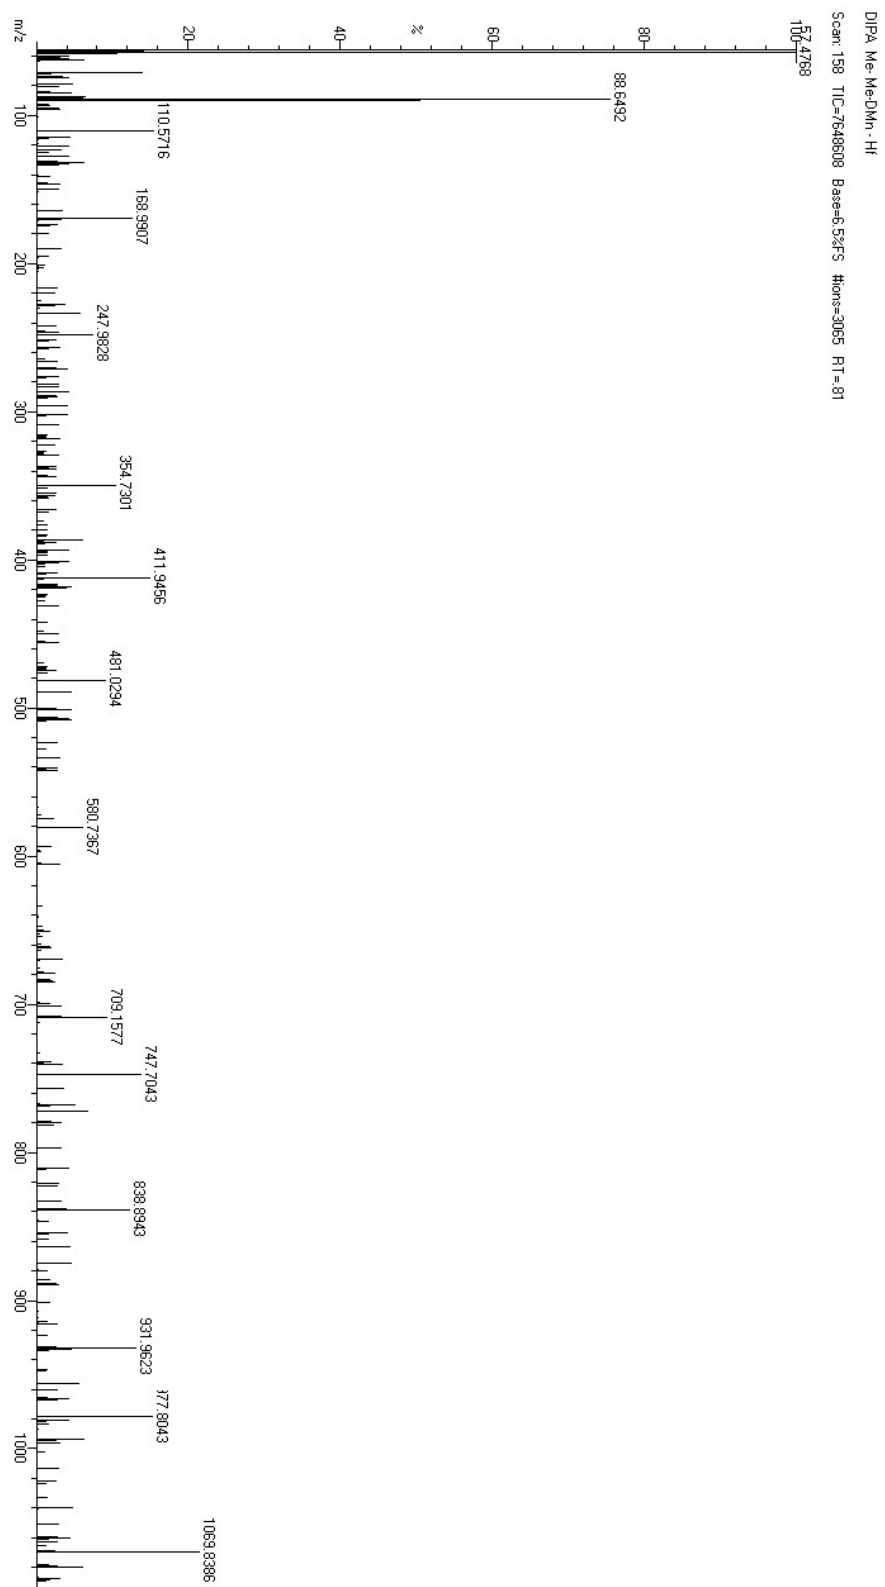

Fig. S24. EI-MS spectrum of 2c

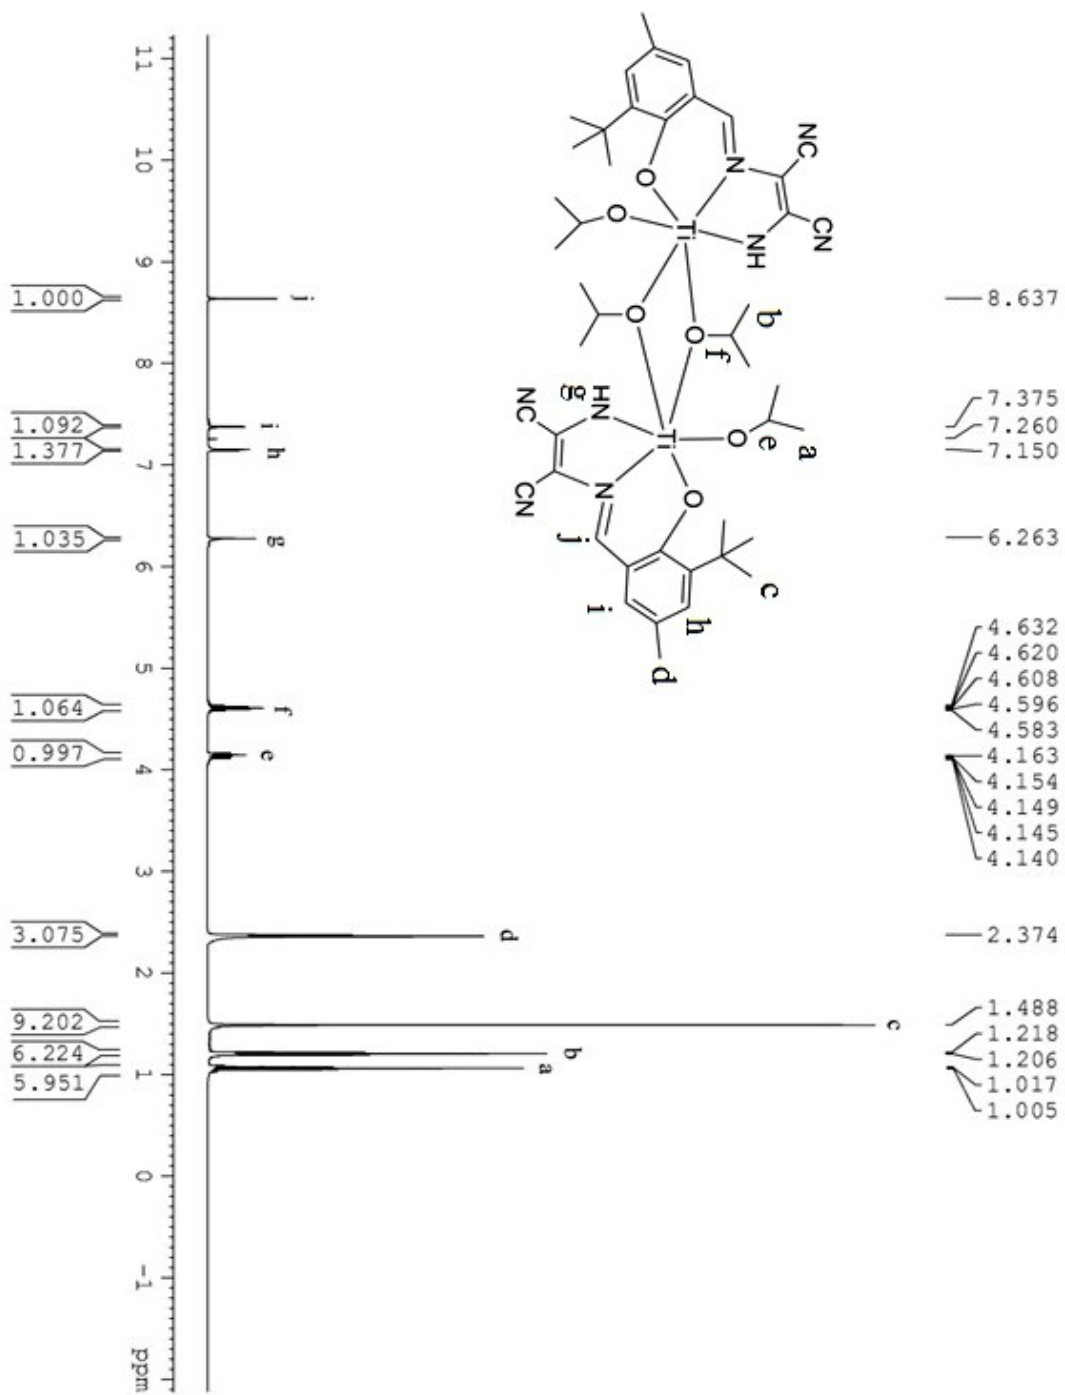

**Fig. S25.**  $^1\text{H}$  NMR (500 MHz,  $\text{CDCl}_3$ ) of **3a**

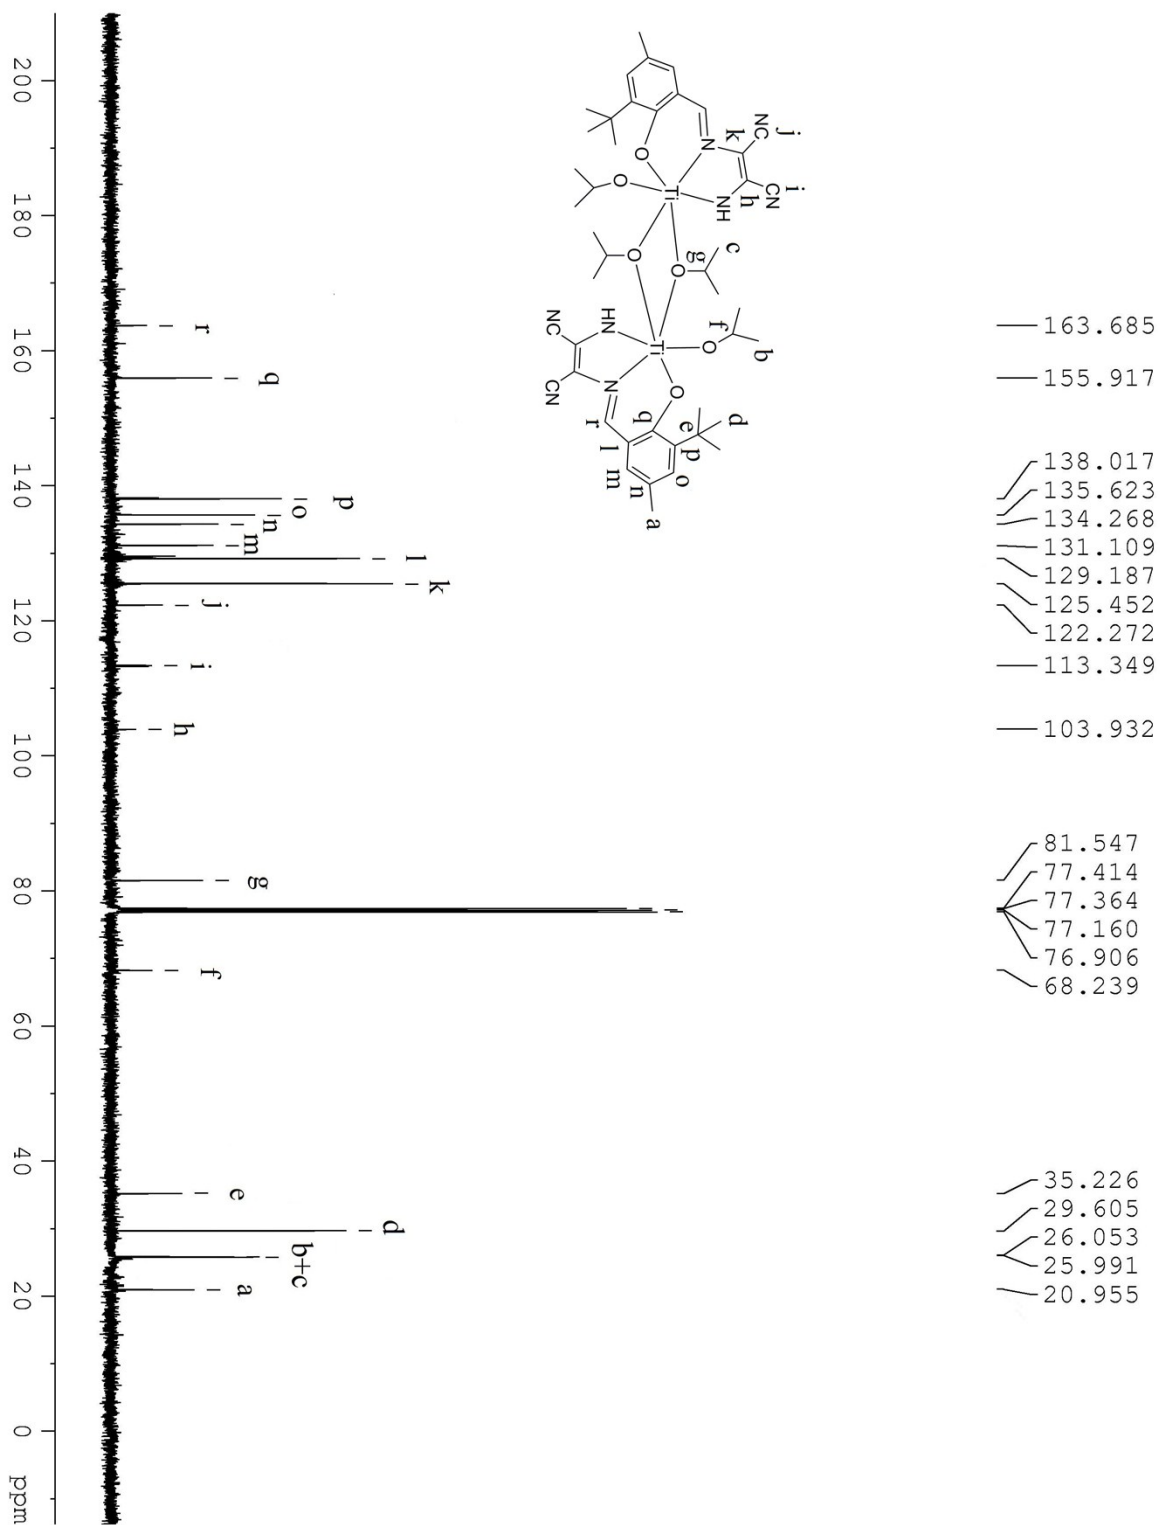

**Fig. S26.**  $^{13}\text{C}$  NMR (125 MHz,  $\text{CDCl}_3$ ) of **3a**

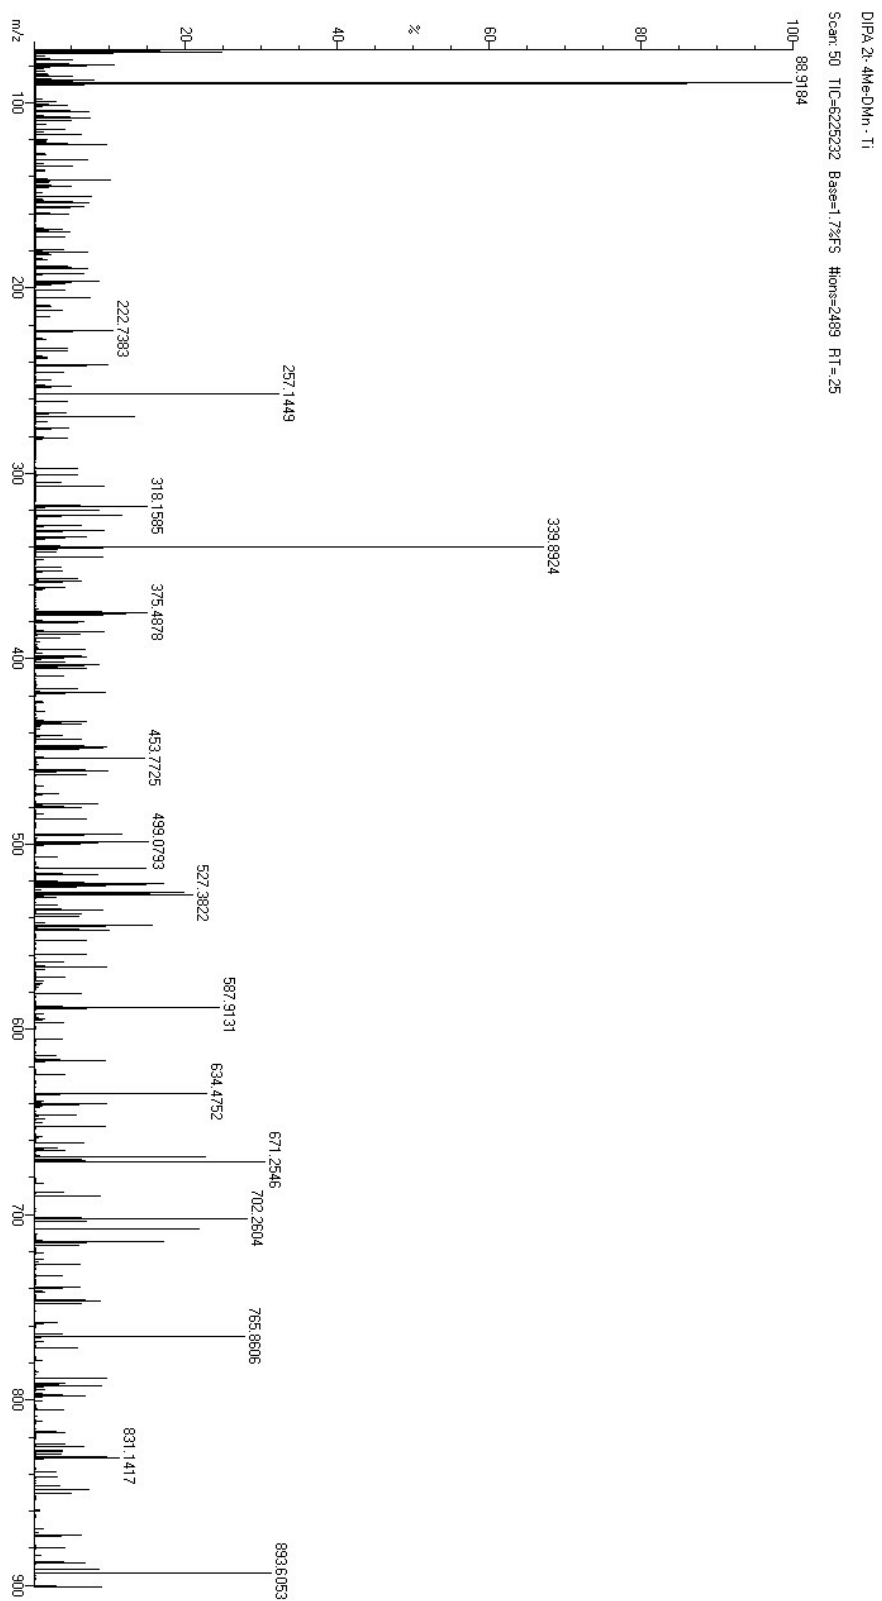

**Fig. S27.** EI-MS spectrum of **3a**

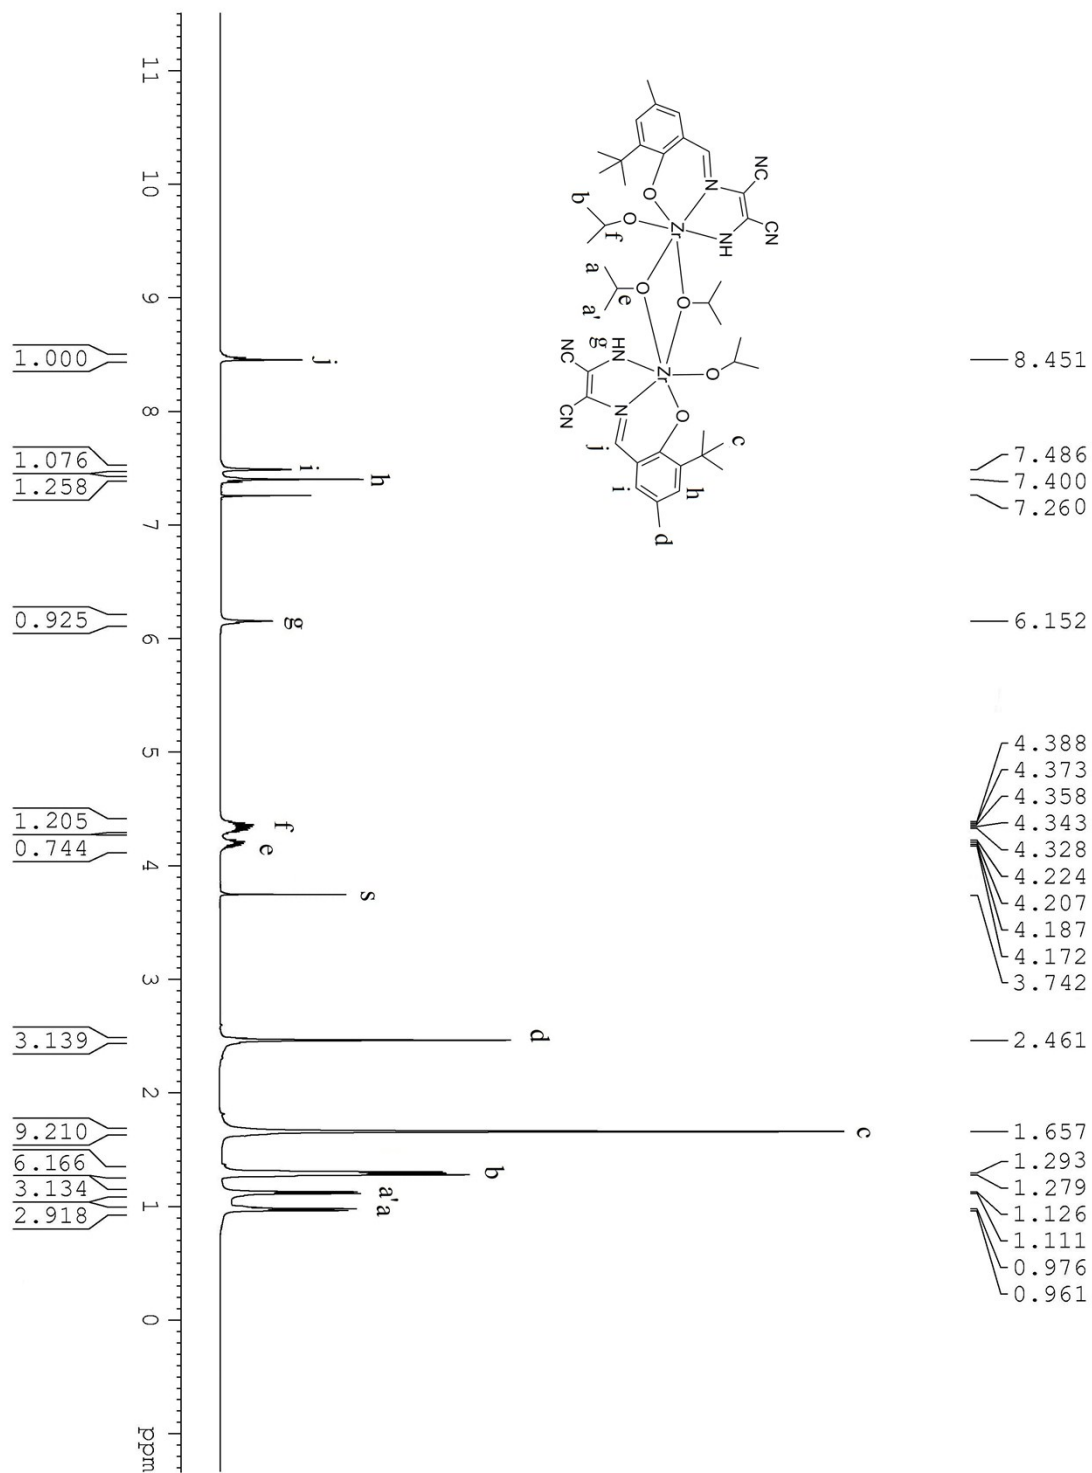

**Fig. S28.** <sup>1</sup>H NMR (500 MHz, CDCl<sub>3</sub>) of **3b**

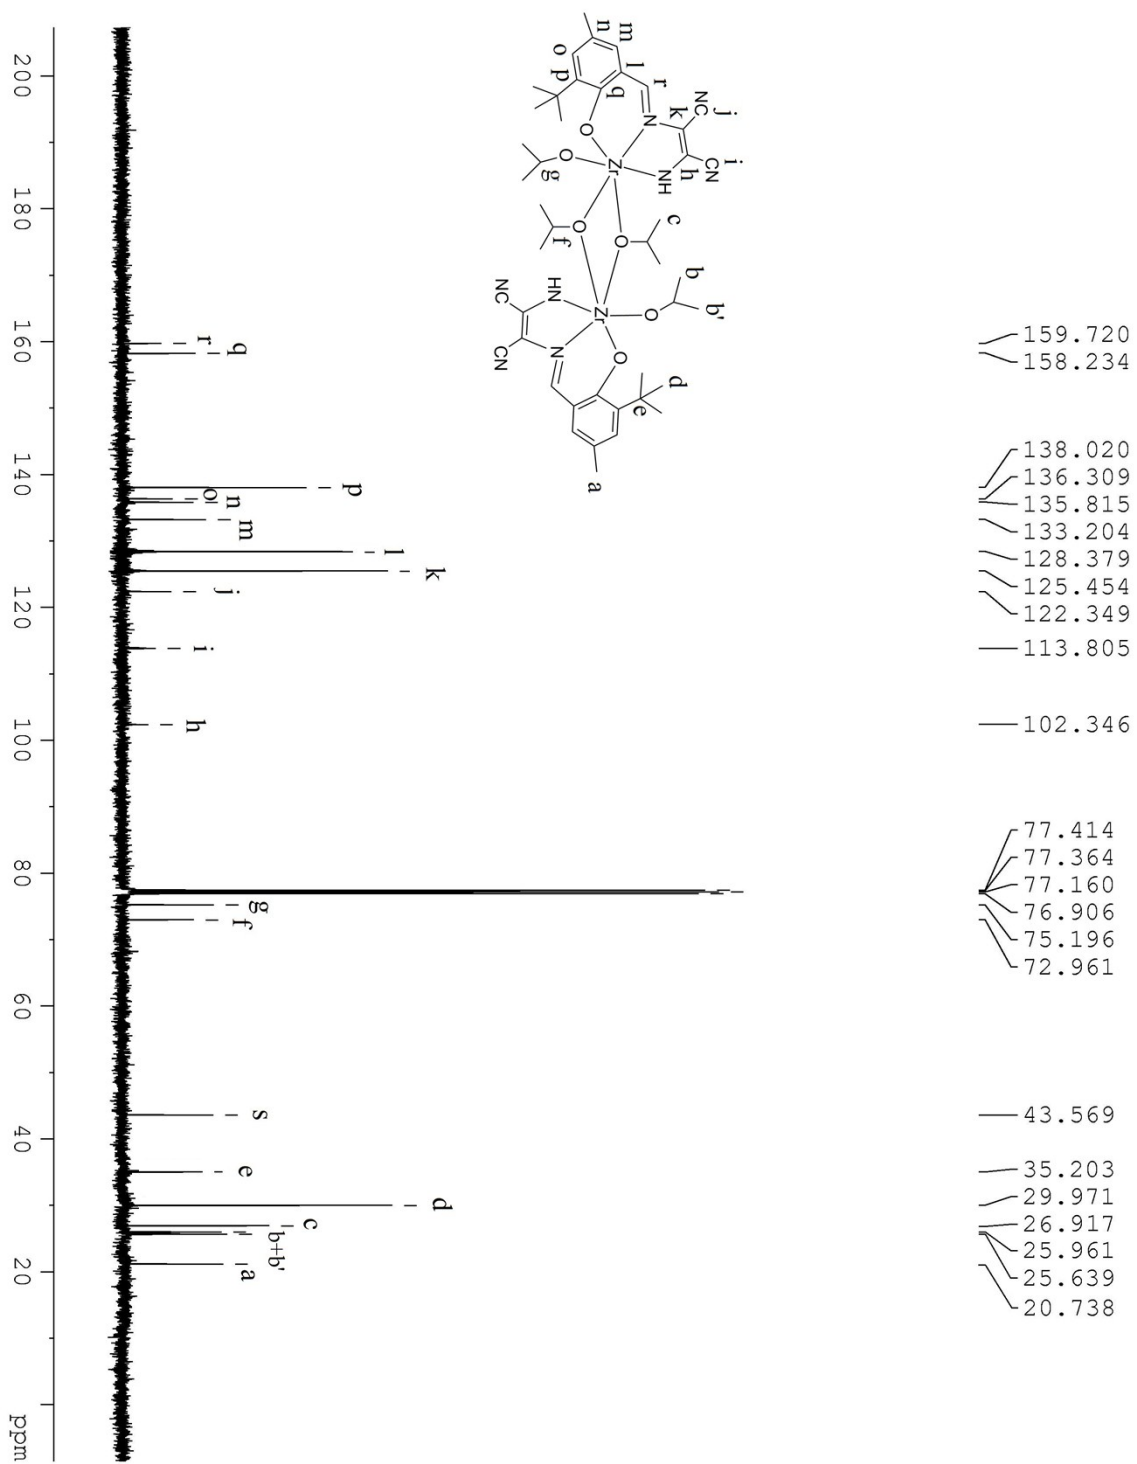

**Fig. S29.**  $^{13}\text{C}$  NMR (125 MHz,  $\text{CDCl}_3$ ) of **3b**

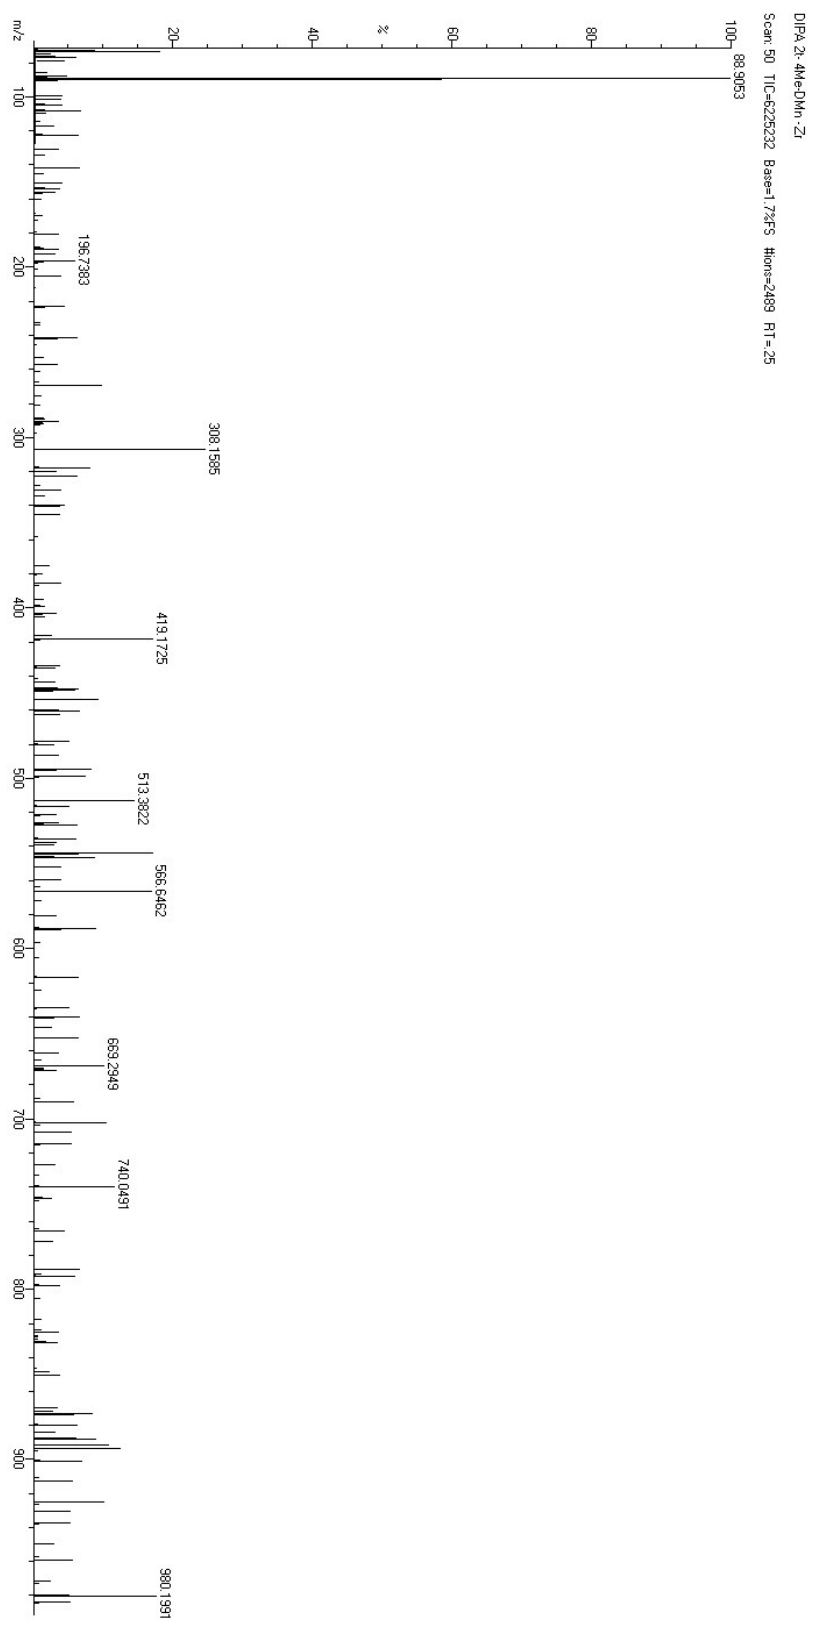

Fig. S30. EI-MS spectrum of **3b**



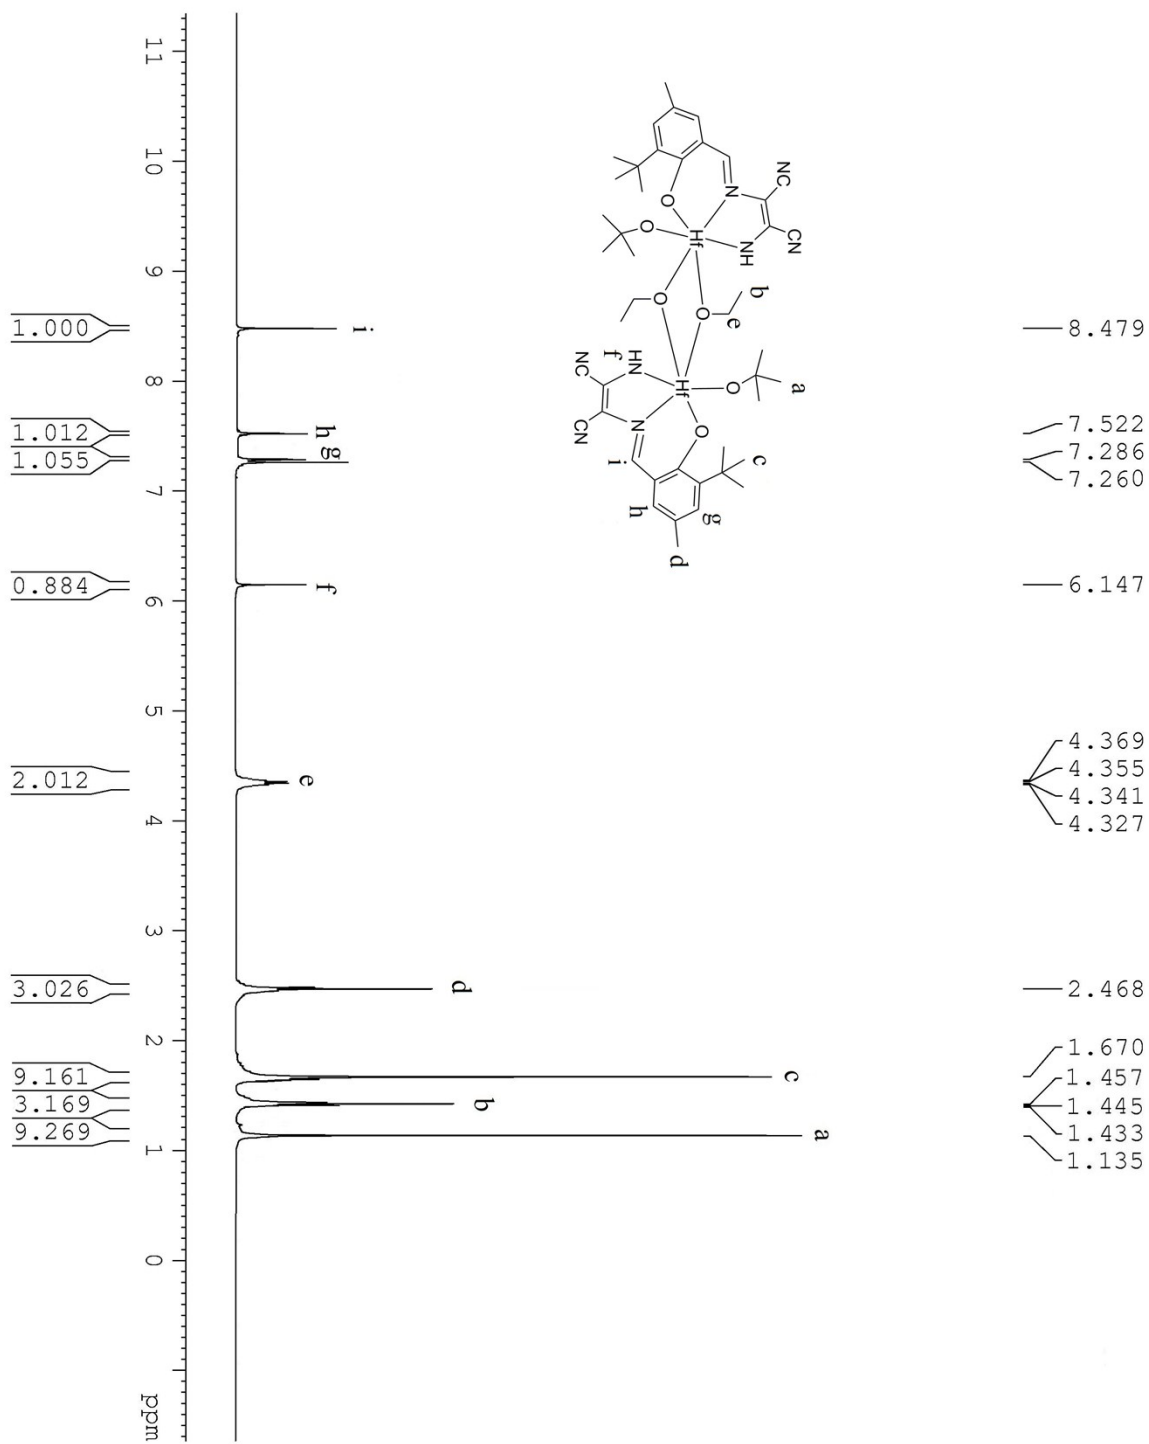

**Fig. S31.**  $^1\text{H}$  NMR (500 MHz,  $\text{CDCl}_3$ ) of **3c**

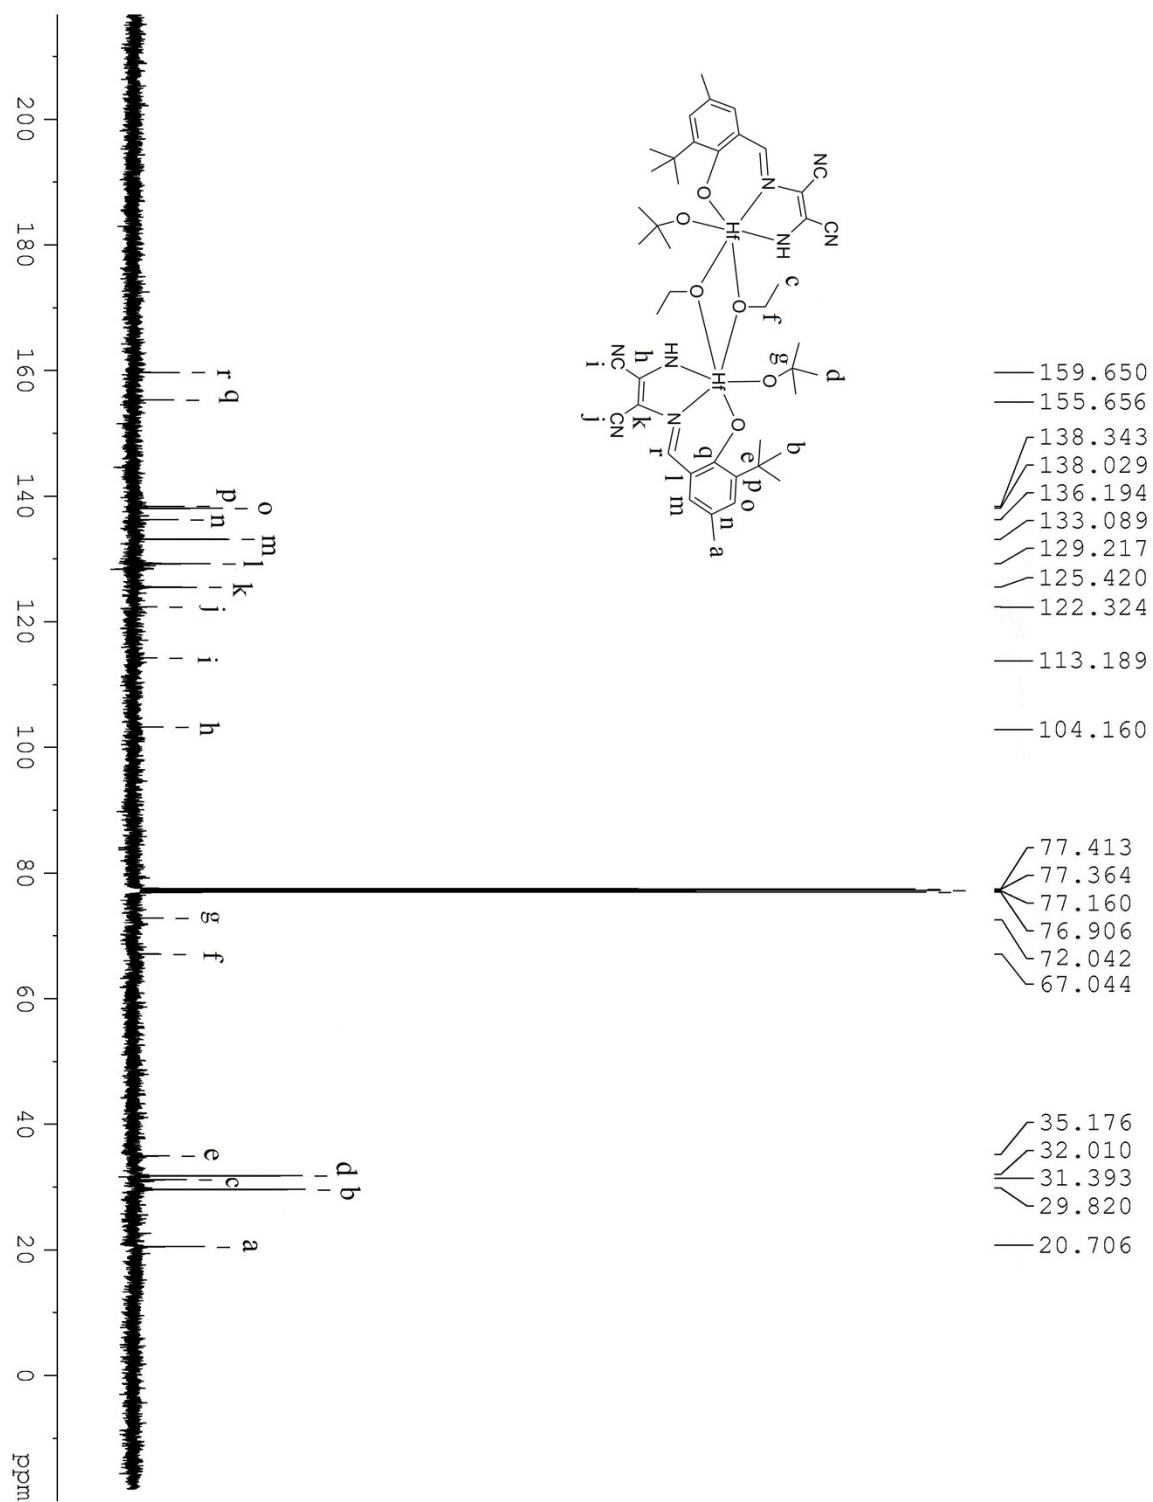

**Fig. S32.**  $^{13}\text{C}$  NMR (125 MHz,  $\text{CDCl}_3$ ) of **3c**

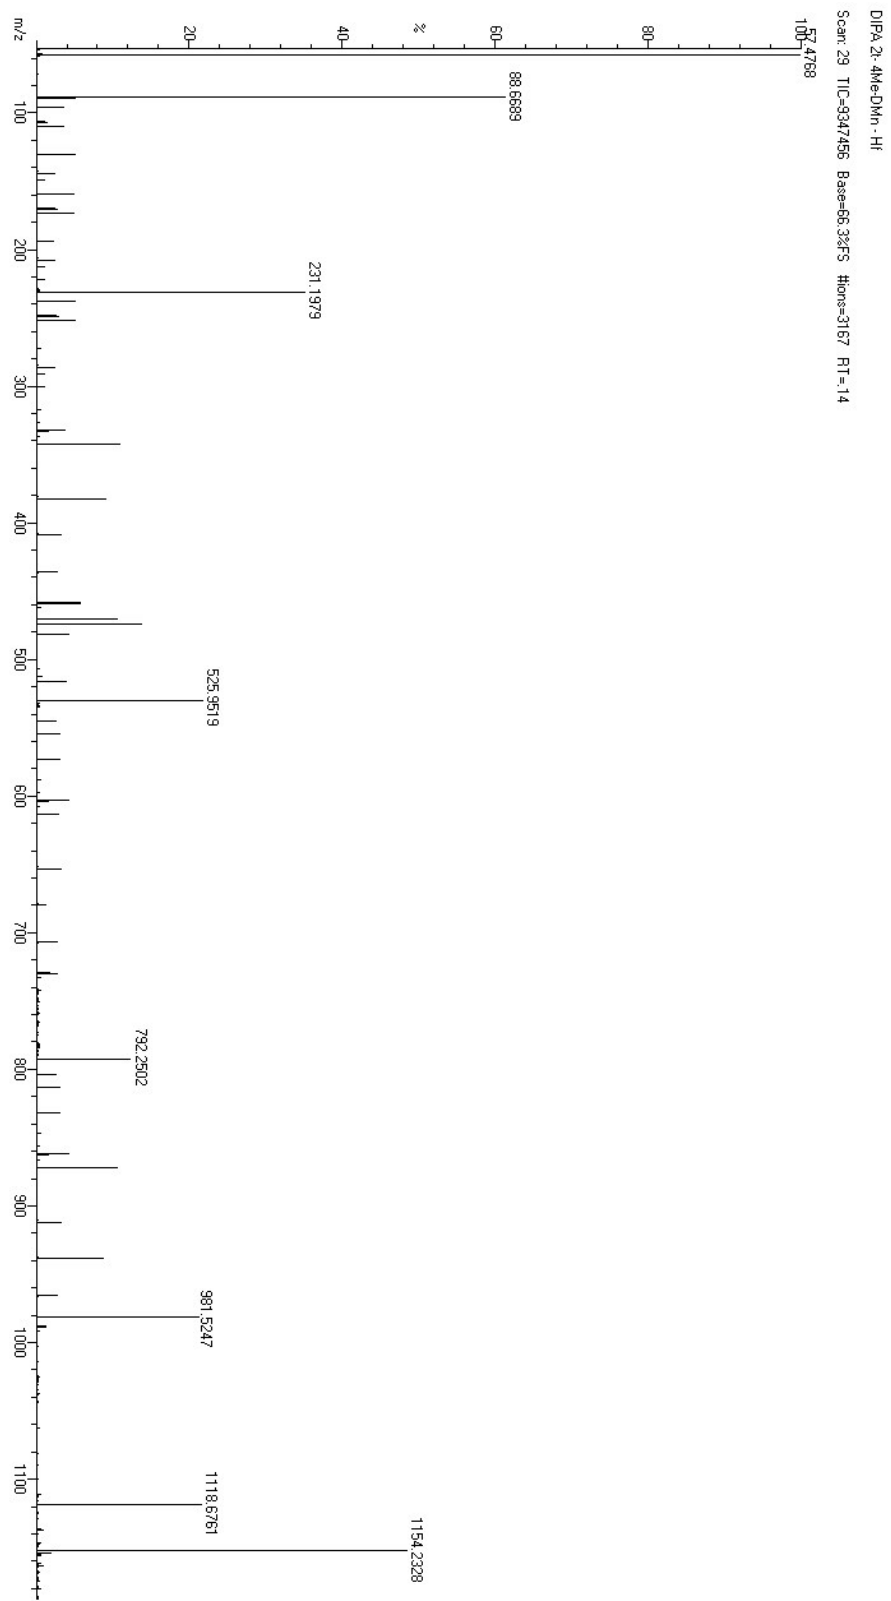

Fig. S33. EI-MS spectrum of 3c

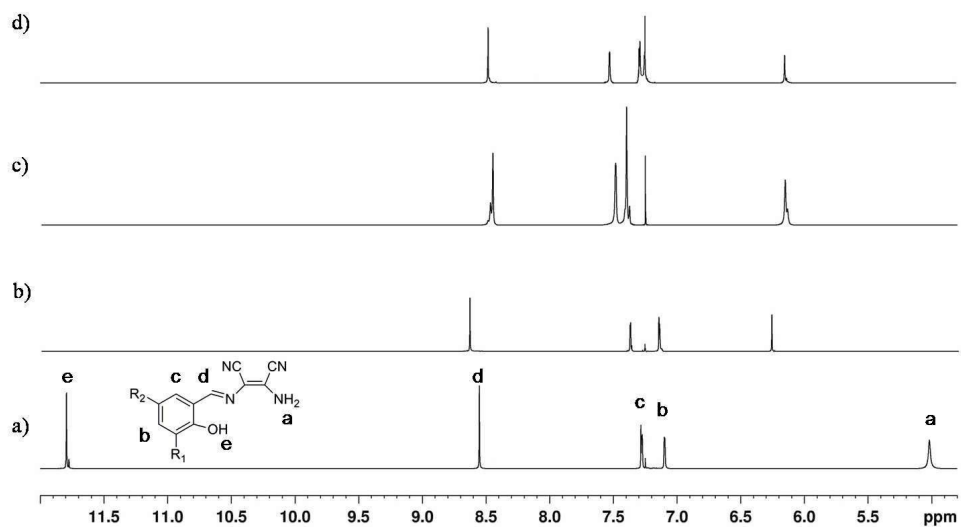

**Figure S34.**  $^1\text{H}$  NMR spectra in  $\text{CDCl}_3$  a) ligand  $[\text{L3}(\text{H}_2)]$ ; b)  $[\text{Ti}(\text{L3})(\text{O}^i\text{Pr})_2]_2$ , **3a**; c)  $[\text{Zr}(\text{L3})(\text{O}^i\text{Pr})_2]_2$ , **3b**; d)  $[\text{Hf}(\text{L3})(\text{O}^i\text{Pr})(\text{OEt})_2]_2$ , **3c**.

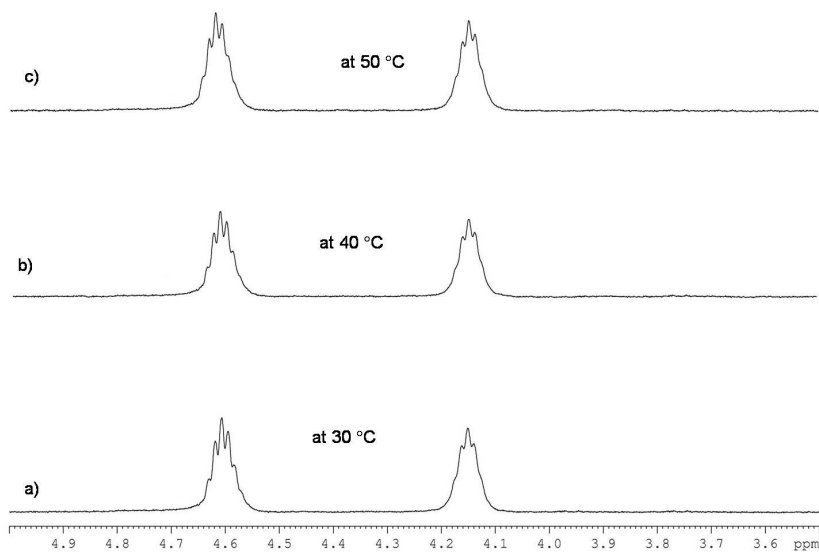

**Figure S35.**  $^1\text{H}$  NMR spectra of the methine region of **3a** in  $\text{CDCl}_3$  at variable temperature a) 30 °C; b) 40 °C and c) 50 °C.

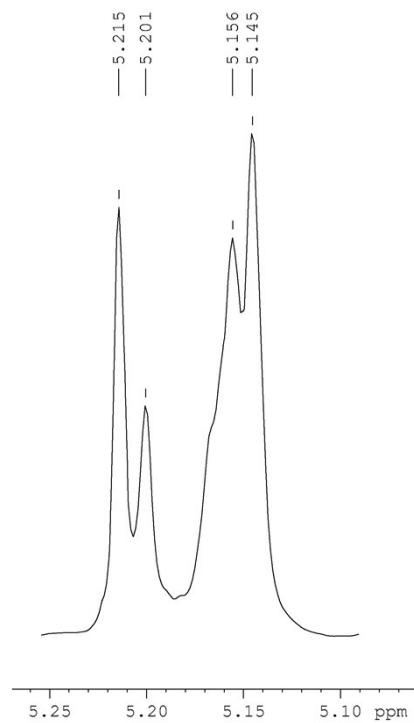

**Fig. S36.** Homonuclear decoupled  $^1\text{H}$  NMR of the methine region of PLA prepared with *rac*-LA and **3c**. [Heterotactic-rich,  $P_r=0.80$ ]

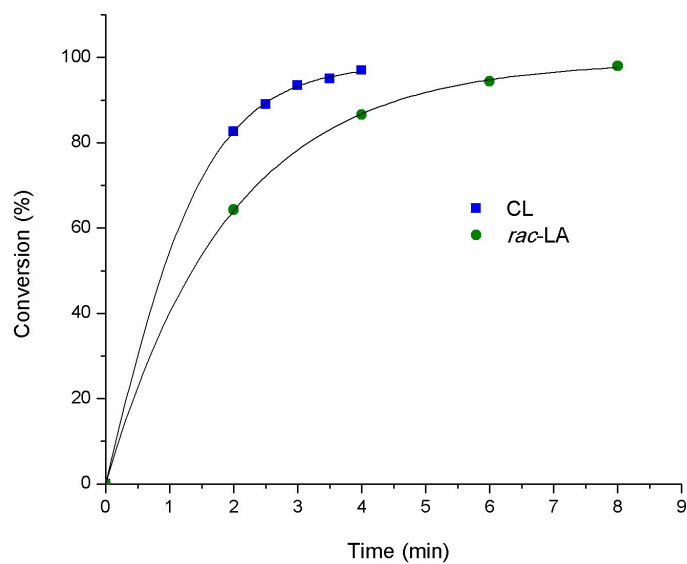

**Fig. S37.** Monomer ( $\epsilon$ -CL and *rac*-LA) conversion vs. time plot initiated by **1a** at  $[\text{M}]_0/[\text{C}]_0=200:1$

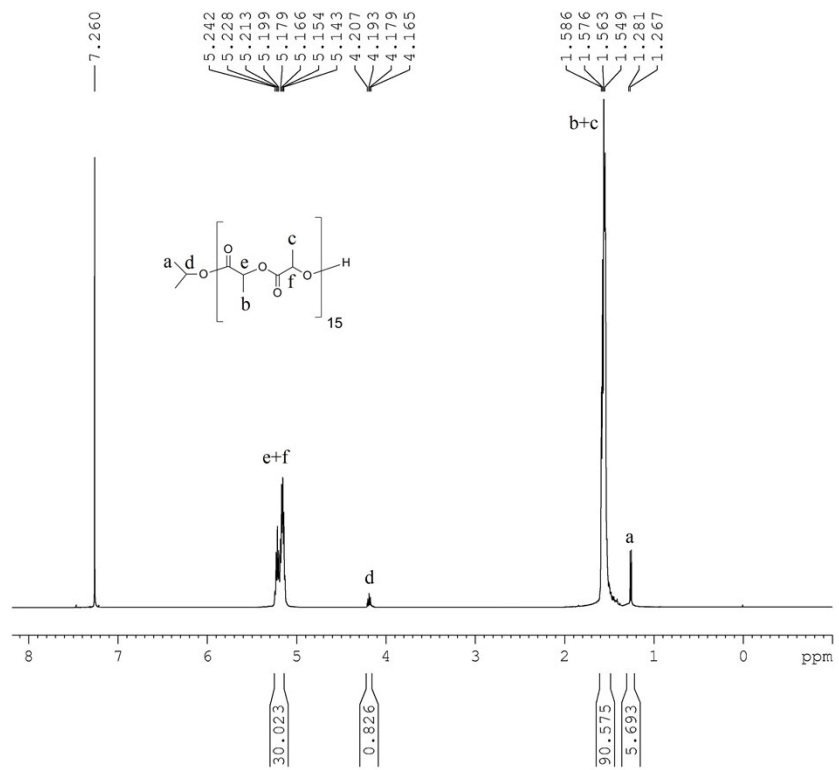

**Figure S38.**  $^1\text{H}$  NMR spectrum (in  $\text{CDCl}_3$ , 500 MHz) of the low molecular weight PLA obtained from *rac*-LA and **3a** at  $[\text{M}]_0/[\text{Cat}]_0=15:1$  at  $140\text{ }^\circ\text{C}$ .

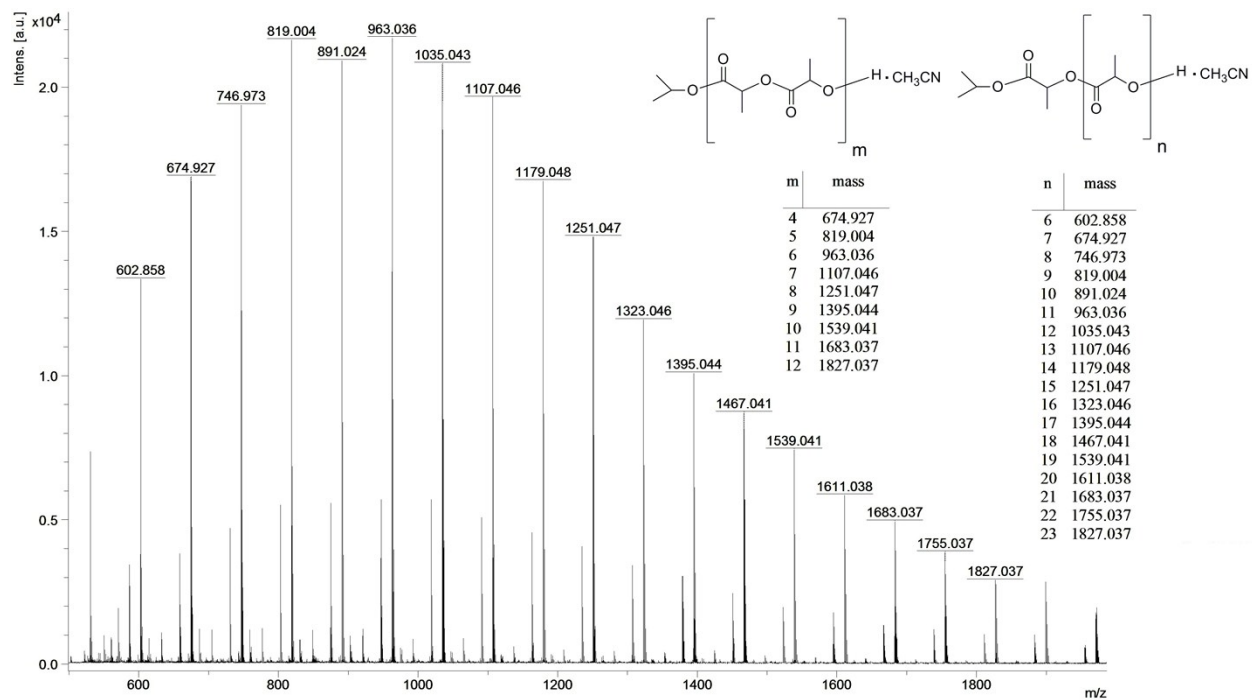

**Figure S39.** MALDI-TOF mass spectrum of the low molecular weight PLA obtained from *rac*-LA and **3a** at  $[M]_0/[Cat]_0=15:1$  at 140 °C.

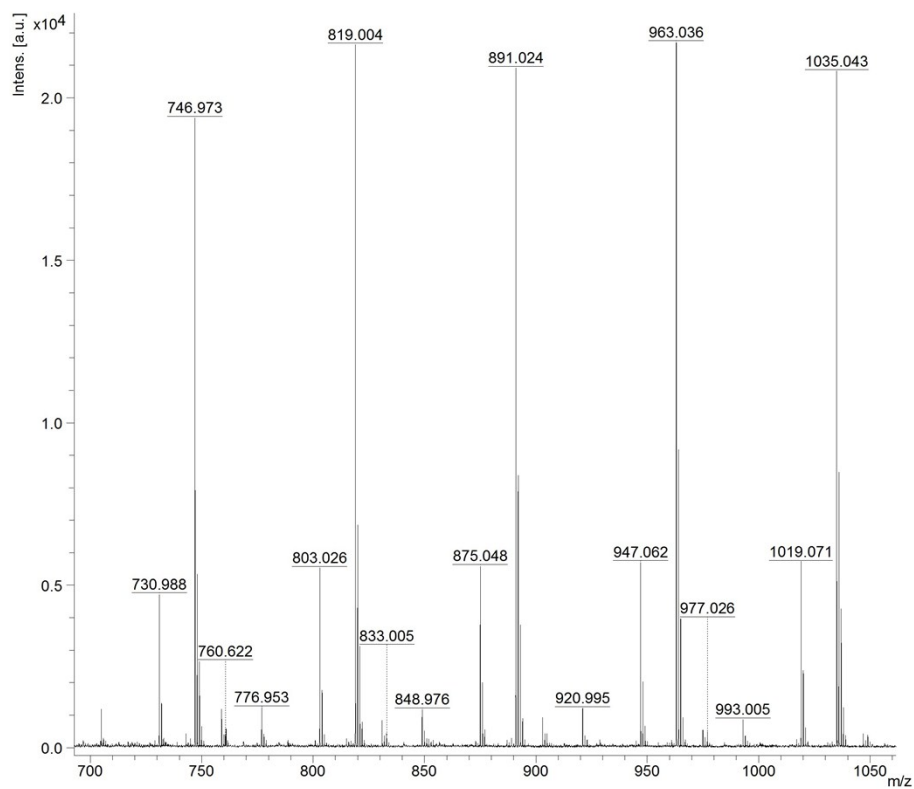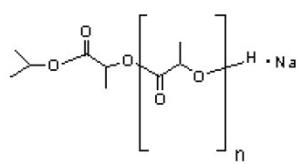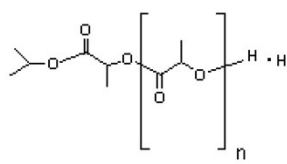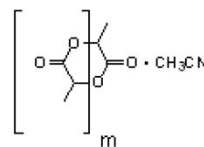

| m  | Mass    |
|----|---------|
| 9  | 760.622 |
| 10 | 833.005 |
| 11 | 905.027 |
| 12 | 977.026 |

| n  | Mass     |
|----|----------|
| 9  | 803.026  |
| 10 | 875.048  |
| 11 | 947.062  |
| 12 | 1019.071 |

| n  | Mass    |
|----|---------|
| 9  | 776.953 |
| 10 | 848.976 |
| 11 | 920.995 |
| 12 | 993.005 |

**Fig. S40.** Intramolecular transesterification products present in MALDI-TOF spectrum



**Table S2.** Homopolymerization of *rac*-CHO, *rac*-PO and *rac*-SO catalyzed by **1a-1c** and **2a-2c**<sup>a</sup>.

| Entry | Catalyst  | Epoxide monomer | Time [h] | Conv. <sup>b</sup> [%] | Yield <sup>c</sup> [%] | TOF <sup>d</sup> [h <sup>-1</sup> ] | M <sub>n</sub> <sup>e</sup> (obs) [kg mol <sup>-1</sup> ] | M <sub>w</sub> /M <sub>n</sub> <sup>e</sup> |
|-------|-----------|-----------------|----------|------------------------|------------------------|-------------------------------------|-----------------------------------------------------------|---------------------------------------------|
| 1     | <b>2a</b> | CHO             | 8        | 80                     | 76                     | 100.00                              | 28.25                                                     | 1.28                                        |
| 2     | <b>2b</b> | CHO             | 8        | 76                     | 72                     | 95.00                               | 27.11                                                     | 1.32                                        |
| 3     | <b>2c</b> | CHO             | 8        | 75                     | 74                     | 93.75                               | 26.67                                                     | 1.33                                        |
| 4     | <b>1a</b> | CHO             | 8        | 72                     | 70                     | 90.00                               | 29.77                                                     | 1.30                                        |
| 5     | <b>1b</b> | CHO             | 8        | 69                     | 66                     | 86.25                               | 25.54                                                     | 1.36                                        |
| 6     | <b>1c</b> | CHO             | 8        | 68                     | 65                     | 85.00                               | 25.99                                                     | 1.35                                        |
| 7     | <b>2a</b> | PO              | 16       | 66                     | 62                     | 41.25                               | 20.98                                                     | 1.29                                        |
| 8     | <b>2b</b> | PO              | 16       | 61                     | 57                     | 38.12                               | 19.90                                                     | 1.34                                        |
| 9     | <b>2c</b> | PO              | 16       | 62                     | 60                     | 38.75                               | 21.91                                                     | 1.36                                        |
| 10    | <b>1a</b> | PO              | 16       | 65                     | 63                     | 40.62                               | 22.54                                                     | 1.32                                        |
| 11    | <b>1b</b> | PO              | 16       | 60                     | 57                     | 37.50                               | 18.31                                                     | 1.34                                        |
| 12    | <b>1c</b> | PO              | 16       | 61                     | 58                     | 38.12                               | 19.14                                                     | 1.36                                        |
| 13    | <b>2a</b> | SO              | 12       | 65                     | 64                     | 54.17                               | 37.65                                                     | 1.39                                        |
| 14    | <b>2b</b> | SO              | 12       | 63                     | 62                     | 52.50                               | 39.22                                                     | 1.42                                        |
| 15    | <b>2c</b> | SO              | 12       | 60                     | 56                     | 50.00                               | 40.24                                                     | 1.43                                        |
| 16    | <b>1a</b> | SO              | 12       | 61                     | 58                     | 50.83                               | 38.86                                                     | 1.38                                        |
| 17    | <b>1b</b> | SO              | 12       | 62                     | 61                     | 47.50                               | 35.59                                                     | 1.42                                        |
| 18    | <b>1c</b> | SO              | 12       | 60                     | 58                     | 50.00                               | 37.92                                                     | 1.43                                        |

<sup>a</sup>Polymerization conditions: [M]<sub>0</sub>/[C]<sub>0</sub> = 1000, under solvent-free. <sup>b</sup>Determined from <sup>1</sup>H NMR in CDCl<sub>3</sub> at 25 °C. <sup>c</sup>Based on gm of polymer obtained. <sup>d</sup>Turnover frequency (TOF) = Mol of epoxide × (mol of catalyst)<sup>-1</sup> h<sup>-1</sup>. <sup>e</sup>Measured by GPC at 27 °C in THF relative to polystyrene standards.

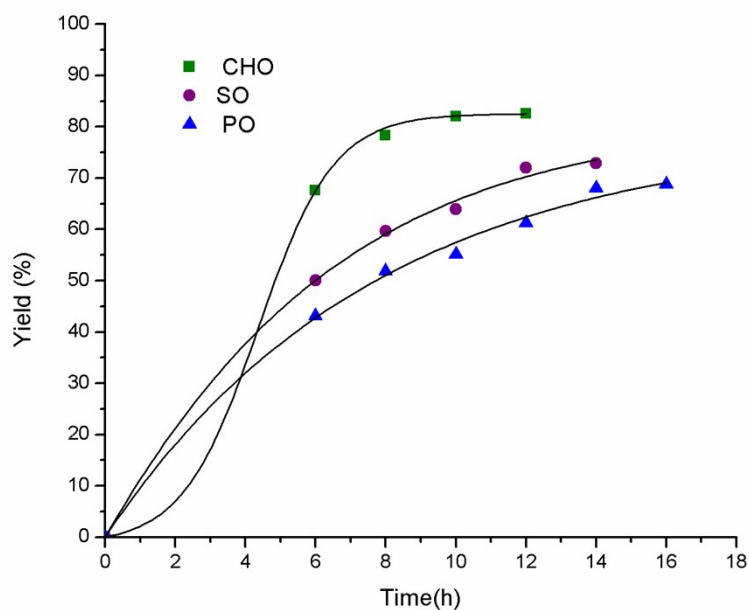**Fig. S41.** Epoxide polymer yield (%) vs. time plot initiated by **3a** at [M]<sub>0</sub>/[C]<sub>0</sub> = 1000:1

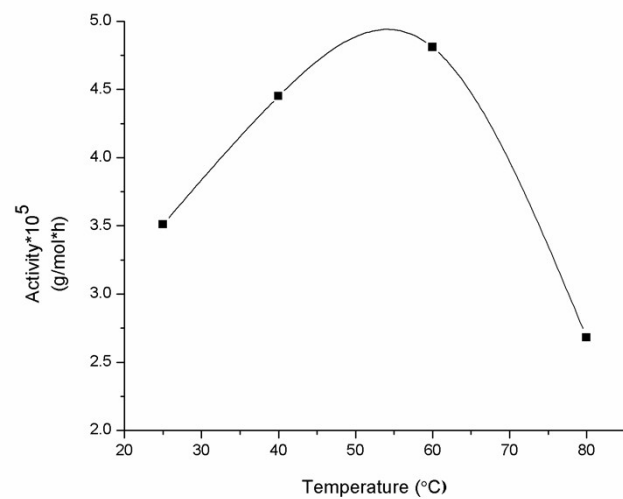

**Fig. S42.** Plot for Activity versus temp using **3a** for ethylene polymerization

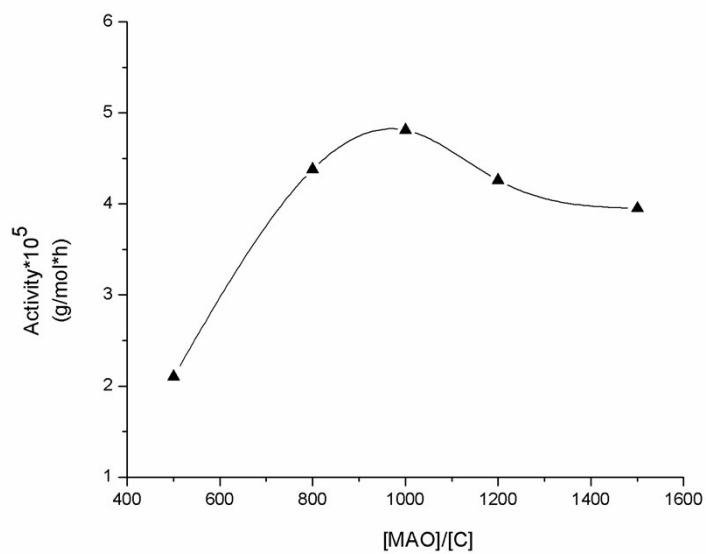

**Fig. S43.** Plot for Activity versus [MAO]/**3a** ratio for ethylene polymerization

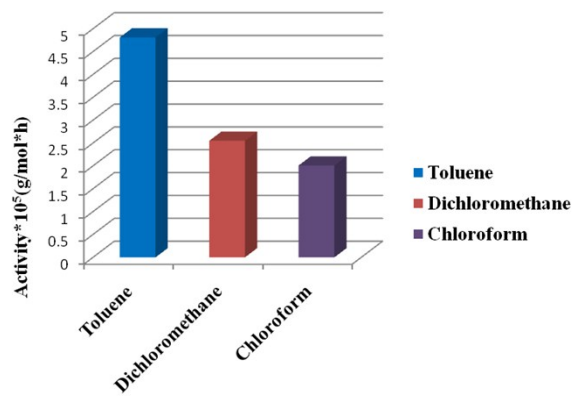

**Fig. S44.** Plot for effect of the solvent on the activity using **3a**
